# Supplementary material for: 3,4-Unsubstituted 2-tert-Butyl-pyrrolidine-1-oxyls with Hydrophilic Functional Groups in the Side Chains
Source: MDPI journal article supplement (doi:10.3390/molecules27061922), 2022-03-16
Supplement: s1 [file s1]

# 3,4-Unsubstituted 2-*tert*-butyl-pyrrolidine-1-oxyls with hydrophilic functional groups in the side chains

Andrey I. Taratayko<sup>1,\*</sup>, Yuriy I. Glazachev<sup>2</sup>, Ilia V. Eltsov<sup>3</sup>, Elena I. Chernyak<sup>1</sup> and Igor A. Kirilyuk<sup>1</sup>

<sup>1</sup> N.N. Vorozhtsov Institute of Organic Chemistry SB RAS, Academician Lavrentiev Ave. 9, Novosibirsk 630090, Russia; taratayk@nioch.nsc.ru

<sup>2</sup> Voevodsky Institute of Chemical Kinetics and Combustion SB RAS, Institutskaya 3, Novosibirsk 630090, Russia

<sup>3</sup> Department of Natural Sciences, Novosibirsk State University, Pirogova Str. 1, Novosibirsk 630090, Russia

\* Correspondence: taratayk@nioch.nsc.ru

## Supporting Information Table of Contents

|                                                                                                                                                    |    |
|----------------------------------------------------------------------------------------------------------------------------------------------------|----|
| 1. IR spectral data .....                                                                                                                          | 3  |
| 1.1 Methyl 3-(5- <i>tert</i> -butyl-2-ethyl-1-oxido-3,4-dihydro-2 <i>H</i> -pyrrol-2-yl)propanoate ( <b>4a</b> ) .....                             | 3  |
| 1.2 Dimethyl 3,3'-(5- <i>tert</i> -butyl-1-oxido-3,4-dihydro-2 <i>H</i> -pyrrole-2,2-diyl)dipropoanoate ( <b>4b</b> ).....                         | 3  |
| 1.3 3-(5- <i>tert</i> -Butyl-2-ethyl-1-oxido-3,4-dihydro-2 <i>H</i> -pyrrol-2-yl)propanoic acid ( <b>5a</b> ) .....                                | 4  |
| 1.4 3,3'-(5- <i>tert</i> -Butyl-1-oxido-3,4-dihydro-2 <i>H</i> -pyrrole-2,2-diyl)dipropoanoic acid ( <b>5b</b> ) .....                             | 4  |
| 1.5 2- <i>tert</i> -Butyl-5-(2-carboxyethyl)-5-ethyl-2-ethynylpyrrolidine-1-oxyl ( <b>7a,a'</b> ) .....                                            | 5  |
| 1.6 2- <i>tert</i> -Butyl-5-ethyl-2-ethynyl-5-(3-methoxy-3-oxopropyl)pyrrolidine-1-oxyl ( <b>8a</b> ) .....                                        | 5  |
| 1.7 2- <i>tert</i> -Butyl-5-(2-carboxyethyl)-2,5-diethylpyrrolidine-1-oxyl ( <b>10a</b> ).....                                                     | 6  |
| 1.8 3-(5- <i>tert</i> -Butyl-2-ethyl-1-oxido-3,4-dihydro-2 <i>H</i> -pyrrol-2-yl)-1-propanol ( <b>11a</b> ) .....                                  | 6  |
| 1.9 3,3'-(5- <i>tert</i> -Butyl-1-oxido-3,4-dihydro-2 <i>H</i> -pyrrole-2,2-diyl)di(1-propanol) ( <b>11b</b> ).....                                | 7  |
| 1.10 5- <i>tert</i> -Butyl-2-ethyl-2-[3-(1-methoxy-1-methylethoxy)propyl]-3,4-dihydro-2 <i>H</i> -pyrrole 1-oxide ( <b>12a</b> ).....              | 7  |
| 1.11 5- <i>tert</i> -Butyl-2,2-bis[3-(1-methoxy-1-methylethoxy)propyl]-3,4-dihydro-2 <i>H</i> -pyrrole 1-oxide ( <b>12b</b> ).....                 | 8  |
| 1.12 2- <i>tert</i> -Butyl-2-ethyl-5,5-bis(3-hydroxypropyl)pyrrolidine-1-oxyl ( <b>14a</b> ) .....                                                 | 8  |
| 1.13 2- <i>tert</i> -Butyl-2-ethyl-5,5-bis(3-hydroxypropyl)pyrrolidine-1-oxyl ( <b>14b</b> ) .....                                                 | 9  |
| 2. <sup>1</sup> H and <sup>13</sup> C NMR spectral data.....                                                                                       | 10 |
| 2.1 Methyl 3-(5- <i>tert</i> -butyl-2-ethyl-1-oxido-3,4-dihydro-2 <i>H</i> -pyrrol-2-yl)propanoate ( <b>4a</b> ) .....                             | 10 |
| 2.2 Dimethyl 3,3'-(5- <i>tert</i> -butyl-1-oxido-3,4-dihydro-2 <i>H</i> -pyrrole-2,2-diyl)dipropoanoate ( <b>4b</b> )..                            | 11 |
| 2.3 3-(5- <i>tert</i> -Butyl-2-ethyl-1-oxido-3,4-dihydro-2 <i>H</i> -pyrrol-2-yl)propanoic acid ( <b>5a</b> ) .....                                | 12 |
| 2.4 3,3'-(5- <i>tert</i> -Butyl-1-oxido-3,4-dihydro-2 <i>H</i> -pyrrole-2,2-diyl)dipropoanoic acid ( <b>5b</b> ) .....                             | 13 |
| 2.5 2- <i>tert</i> -Butyl-5-(2-carboxyethyl)-5-ethyl-2-ethynylpyrrolidinium trifluoroacetate (mixture of diastereomers) ( <b>7a,a'</b> _red) ..... | 14 |
| 2.6 2- <i>tert</i> -Butyl-5-ethyl-2-ethynyl-5-(3-methoxy-3-oxopropyl)pyrrolidinium trifluoroacetate ( <b>8a</b> _red).....                         | 14 |
| 2.7 2- <i>tert</i> -Butyl-5-(2-carboxyethyl)-2,5-diethylpyrrolidinium trifluoroacetate ( <b>10a</b> _red) .....                                    | 15 |

|                                                                                                                                              |    |
|----------------------------------------------------------------------------------------------------------------------------------------------|----|
| 2.8 3-(5- <i>tert</i> -Butyl-2-ethyl-1-oxido-3,4-dihydro-2 <i>H</i> -pyrrol-2-yl)-1-propanol ( <b>11a</b> ) .....                            | 18 |
| 2.9 3,3'-(5- <i>tert</i> -Butyl-1-oxido-3,4-dihydro-2 <i>H</i> -pyrrole-2,2-diyl)di(1-propanol) ( <b>11b</b> ).....                          | 19 |
| 2.10 5- <i>tert</i> -Butyl-2-ethyl-2-[3-(1-methoxy-1-methylethoxy)propyl]-3,4-dihydro-2 <i>H</i> -pyrrole 1-oxide ( <b>12a</b> ).....        | 20 |
| 2.11 5- <i>tert</i> -Butyl-2,2-bis[3-(1-methoxy-1-methylethoxy)propyl]-3,4-dihydro-2 <i>H</i> -pyrrole 1-oxide ( <b>12b</b> ).....           | 21 |
| 2.12 2- <i>tert</i> -Butyl-2,5-diethyl-5-(3-hydroxypropyl)pyrrolidinium trifluoroacetate (mixture of diastereomers) ( <b>14a_red</b> ) ..... | 22 |
| 2.13 2- <i>tert</i> -Butyl-2-ethyl-5,5-bis(3-hydroxypropyl)pyrrolidinium trifluoroacetate ( <b>14b_red</b> )..                               | 22 |
| 3. HPLC analysis .....                                                                                                                       | 23 |
| 3.1 HPLC analysis of 2- <i>tert</i> -Butyl-2-ethyl-5,5-bis(3-hydroxypropyl)pyrrolidine-1-oxyl ( <b>14a</b> ) .....                           | 23 |

## 1. IR spectral data

### 1.1 Methyl 3-(5-*tert*-butyl-2-ethyl-1-oxido-3,4-dihydro-2*H*-pyrrol-2-yl)propanoate (**4a**)

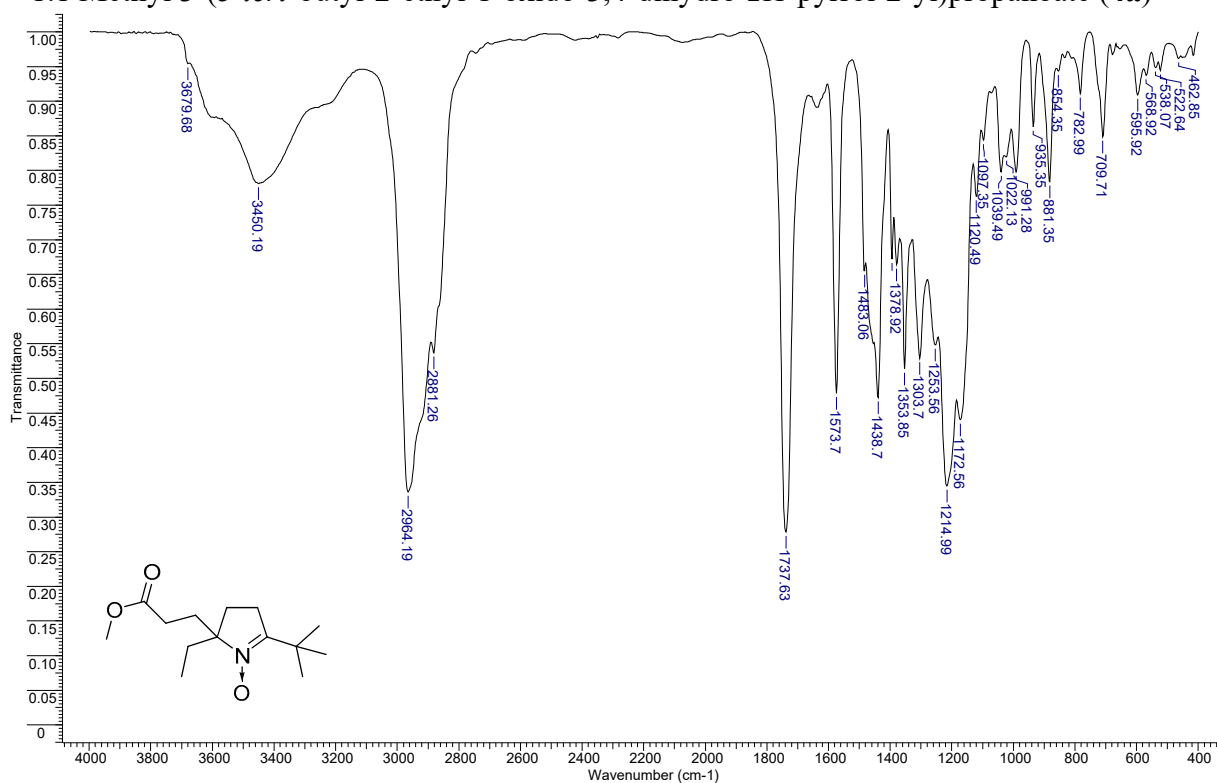

Figure S1. IR spectrum of **4a** (neat)

### 1.2 Dimethyl 3,3'-(5-*tert*-butyl-1-oxido-3,4-dihydro-2*H*-pyrrole-2,2-diyl)dipropionate (**4b**)

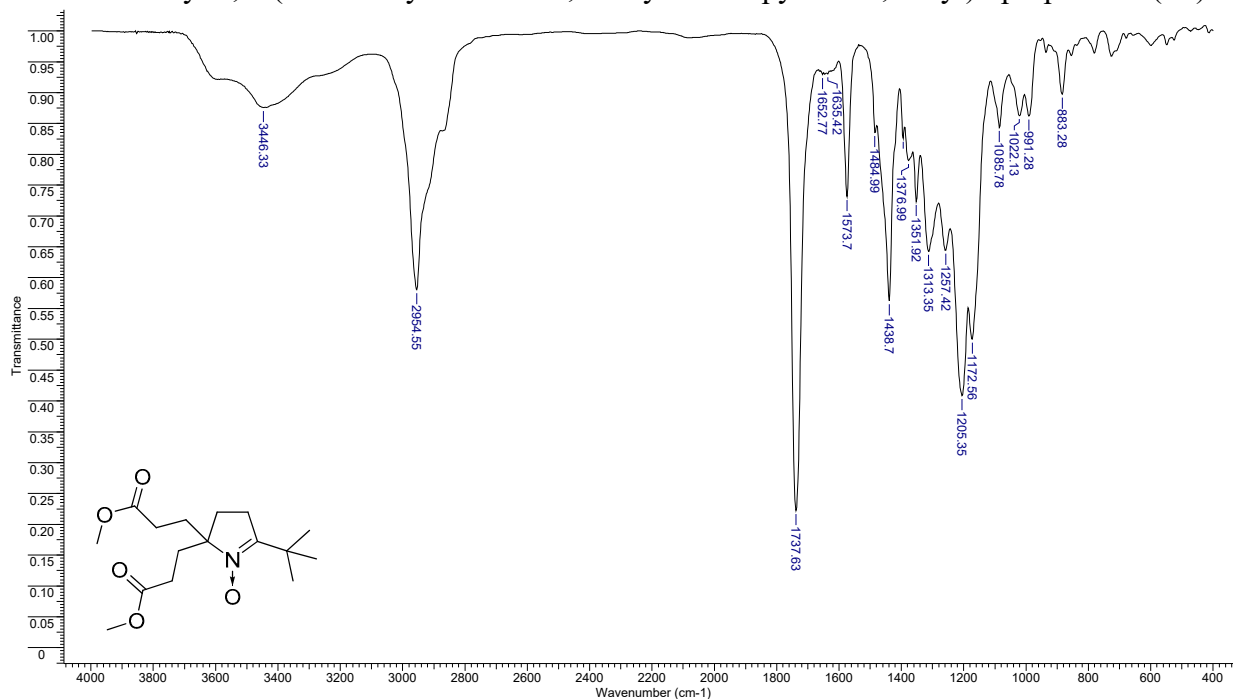

Figure S2. IR spectrum of **4b** (neat)

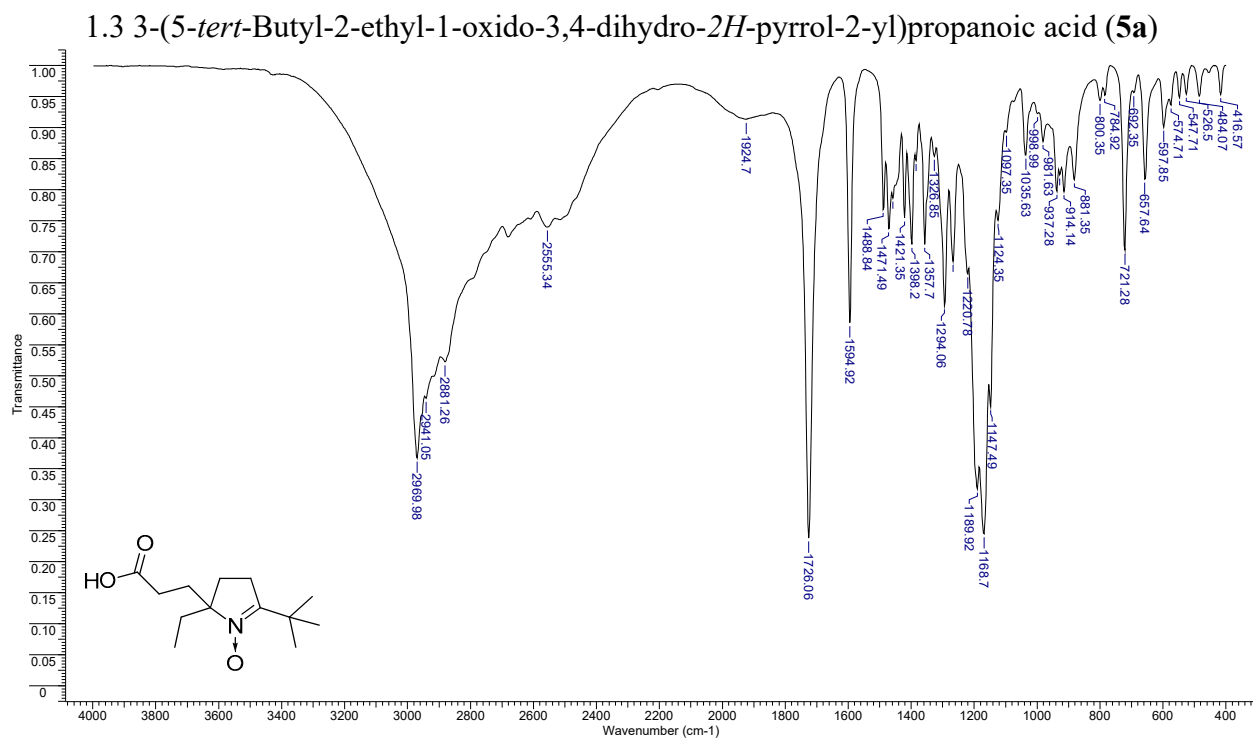

Figure S3. IR spectrum of **5a** (KBr)

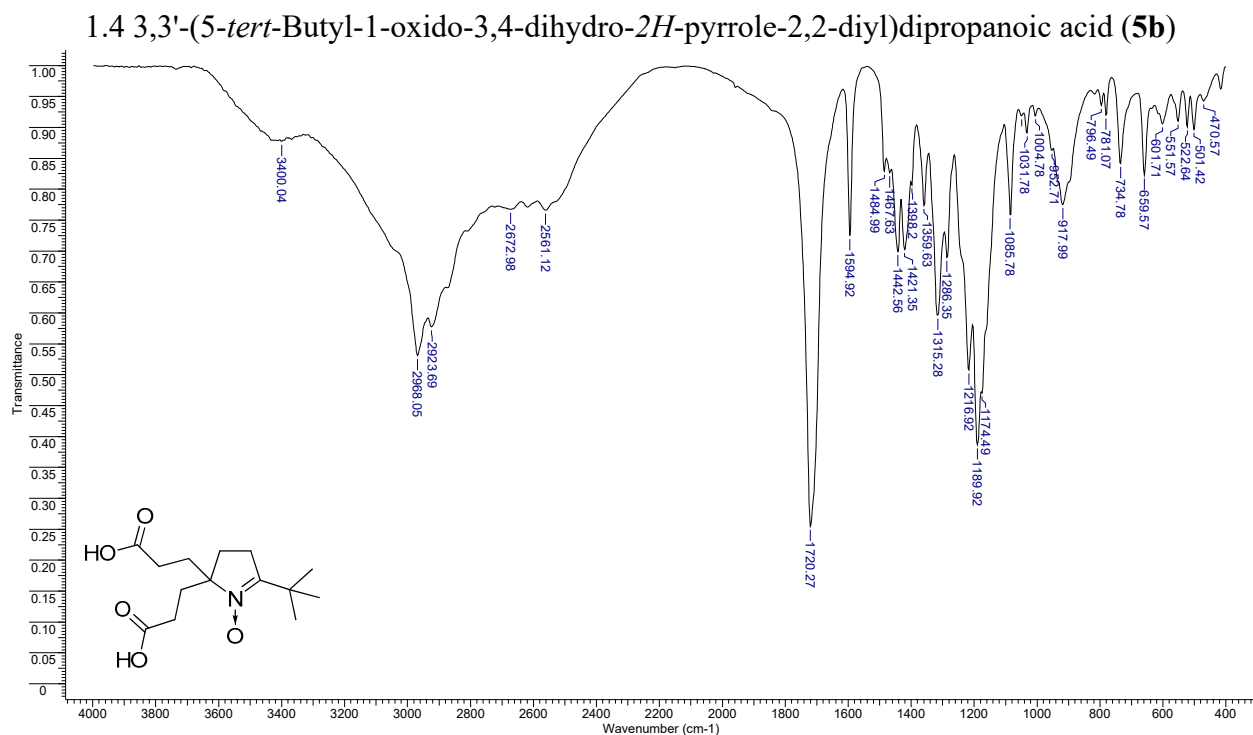

Figure S4. IR spectrum of **5b** (KBr)

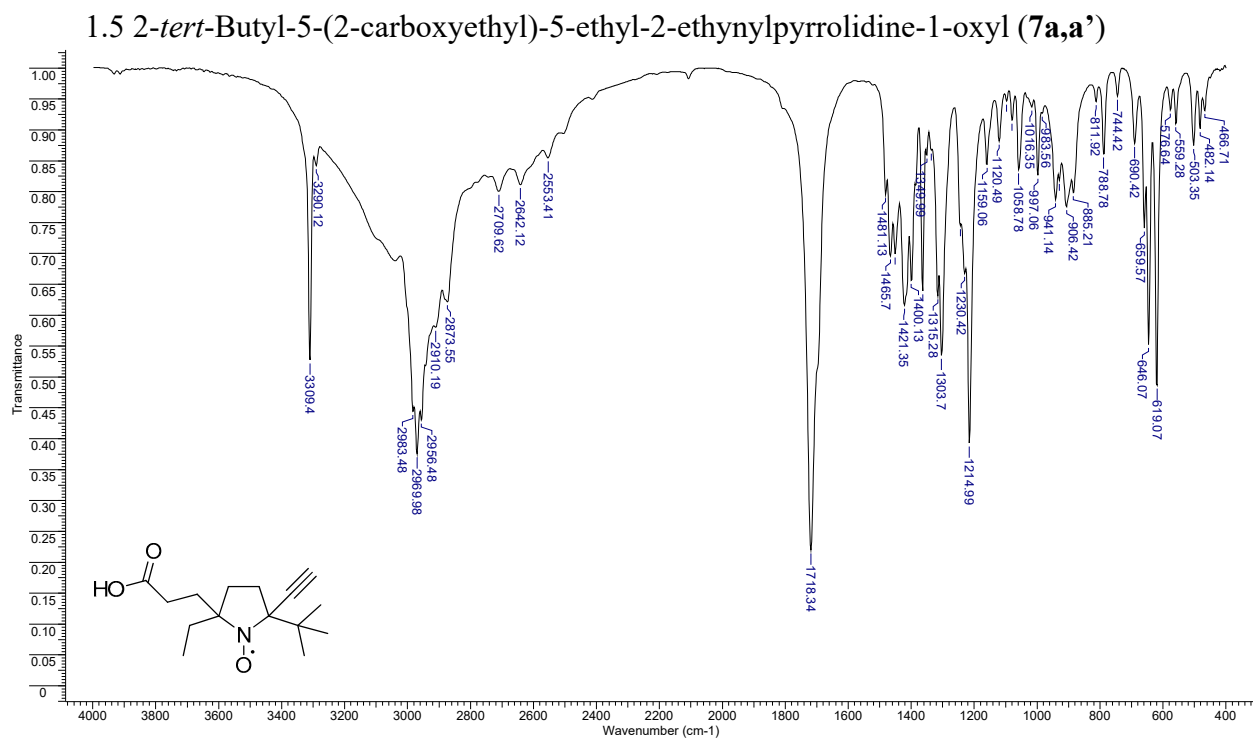

Figure S5. IR spectrum of **7a,a'**

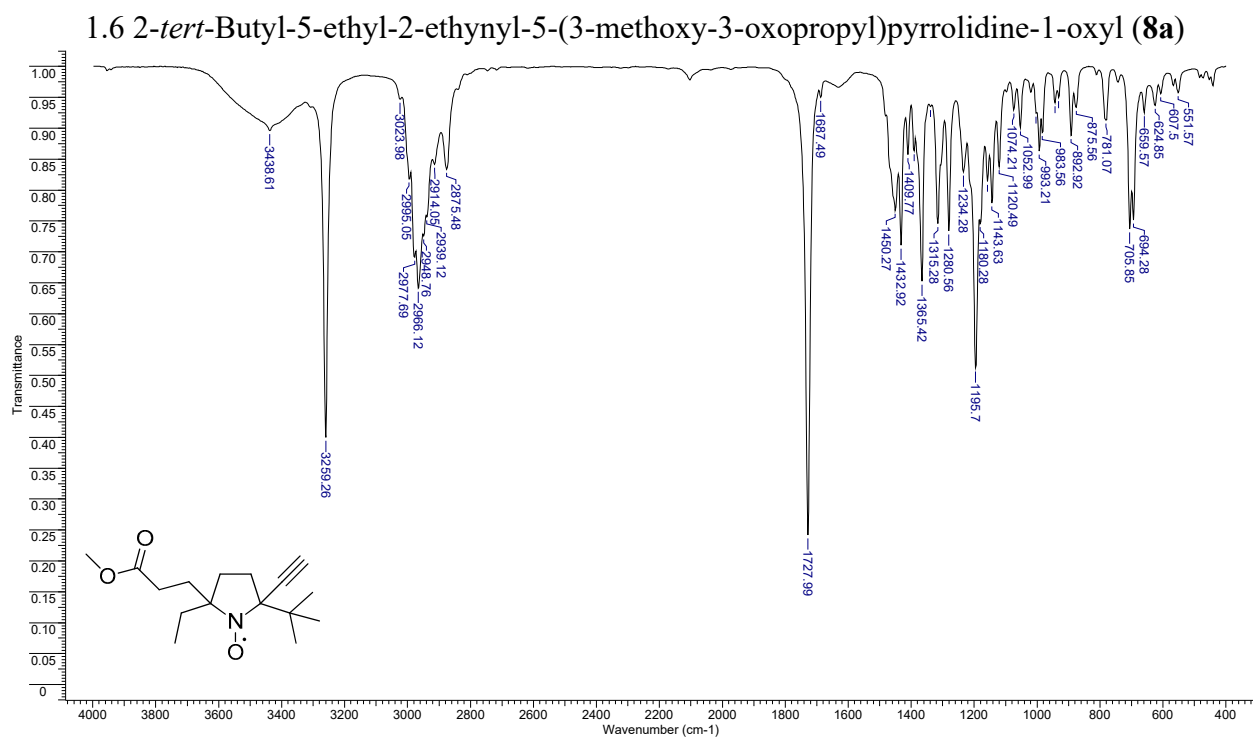

Figure S6. IR spectrum of **8a** (KBr)

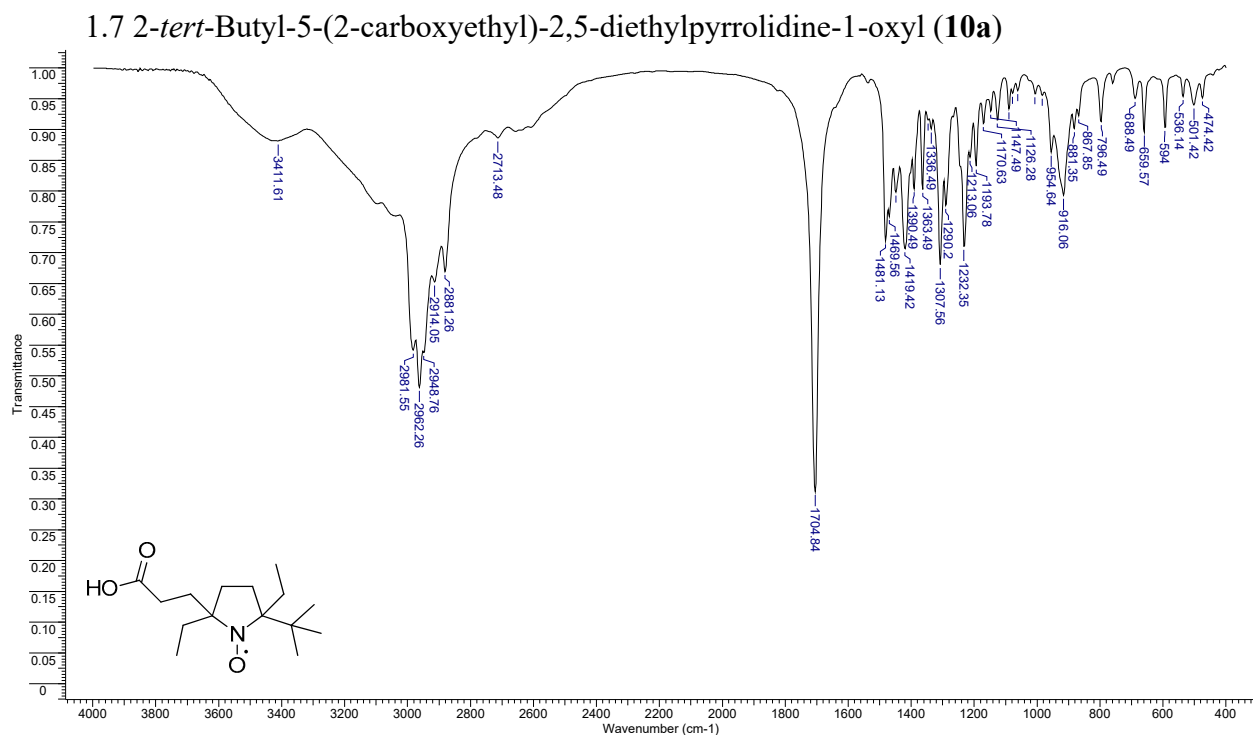

Figure S7. IR spectrum of **10a** (KBr)

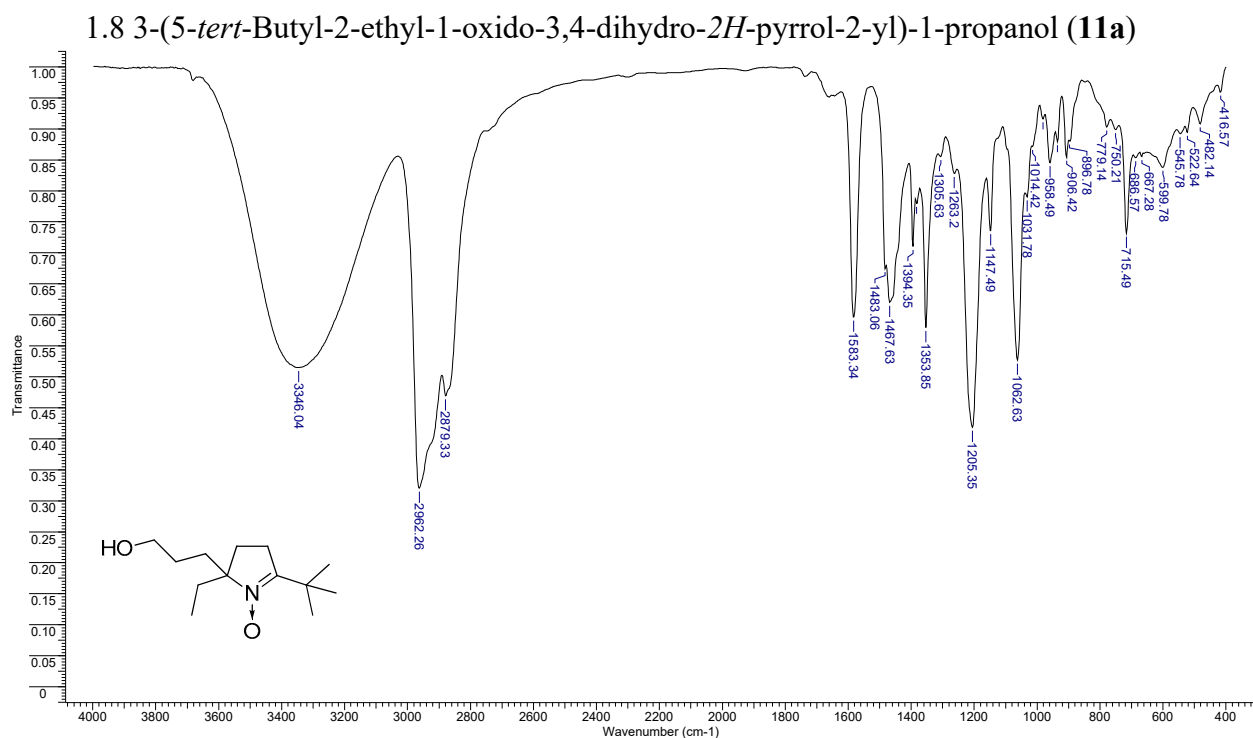

Figure S8. IR spectrum of **11a** (neat)

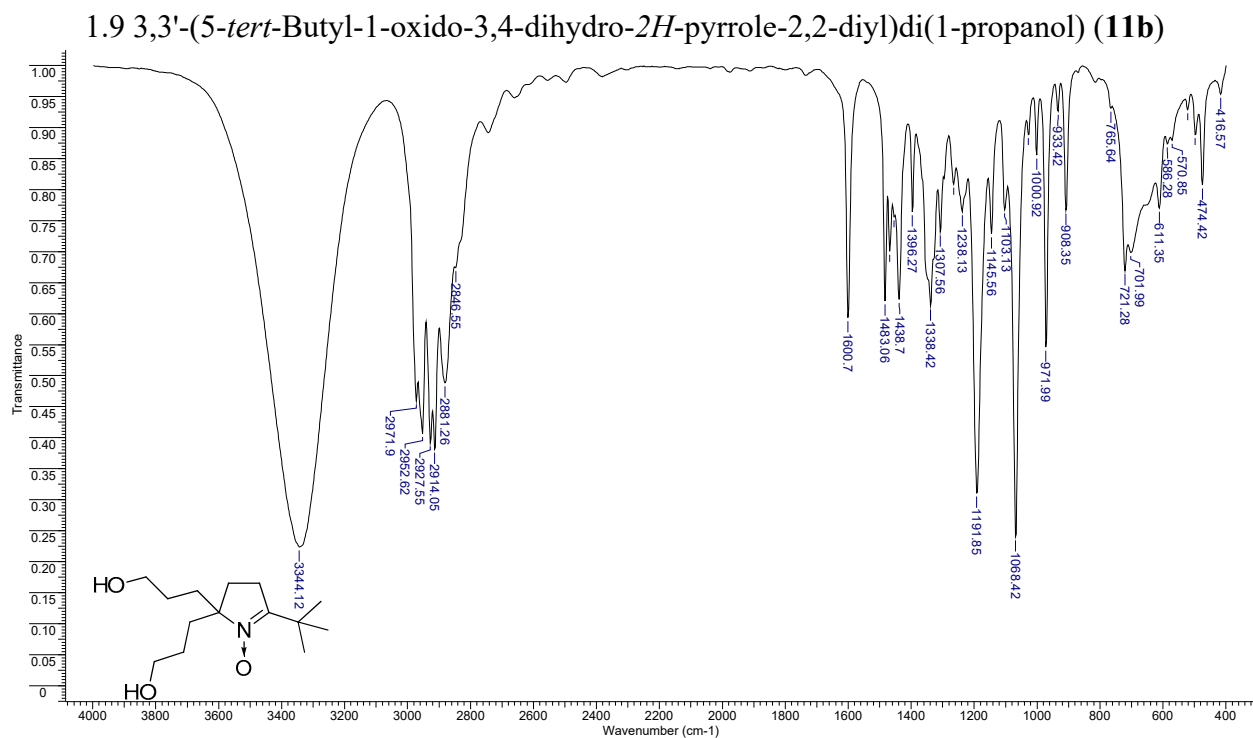

Figure S9. IR spectrum of **11b** (KBr)

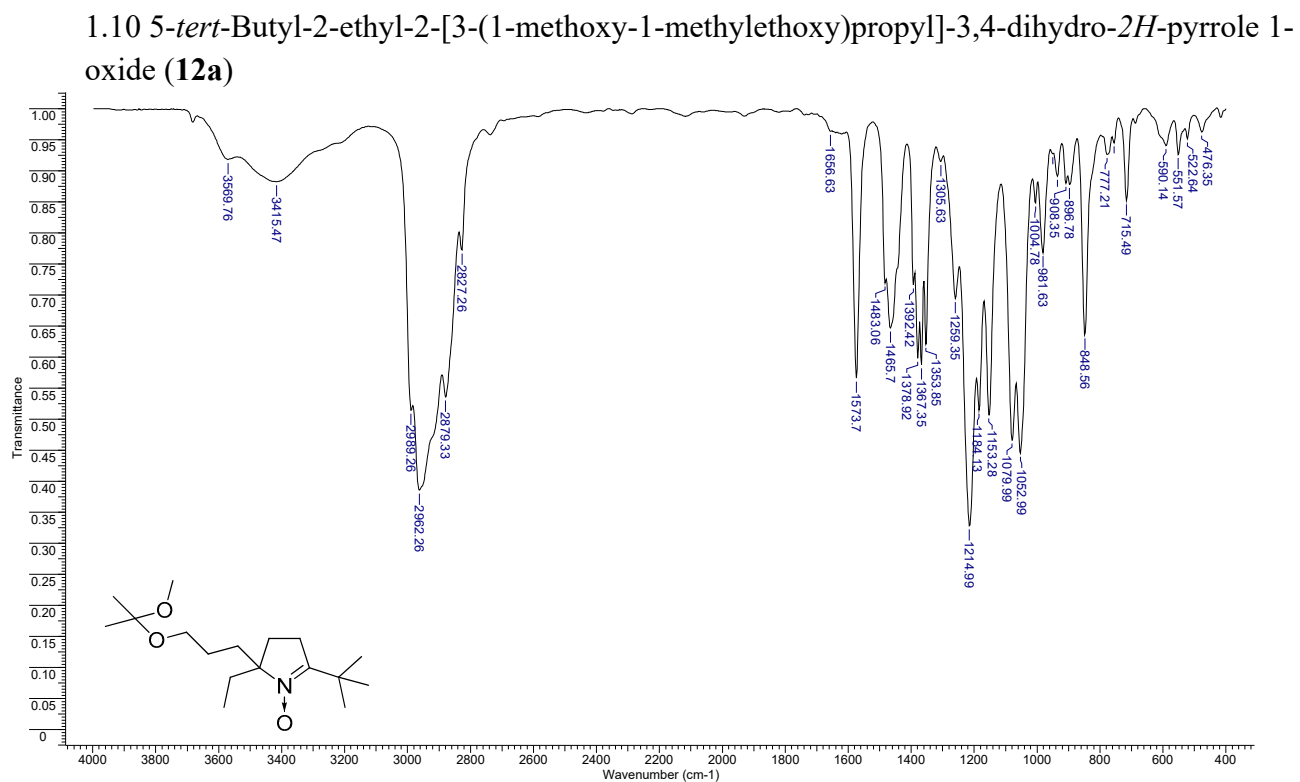

Figure S10. IR spectrum of **12a** (neat)

1.11 5-*tert*-Butyl-2,2-bis[3-(1-methoxy-1-methylethoxy)propyl]-3,4-dihydro-2*H*-pyrrole 1-oxide (12b)

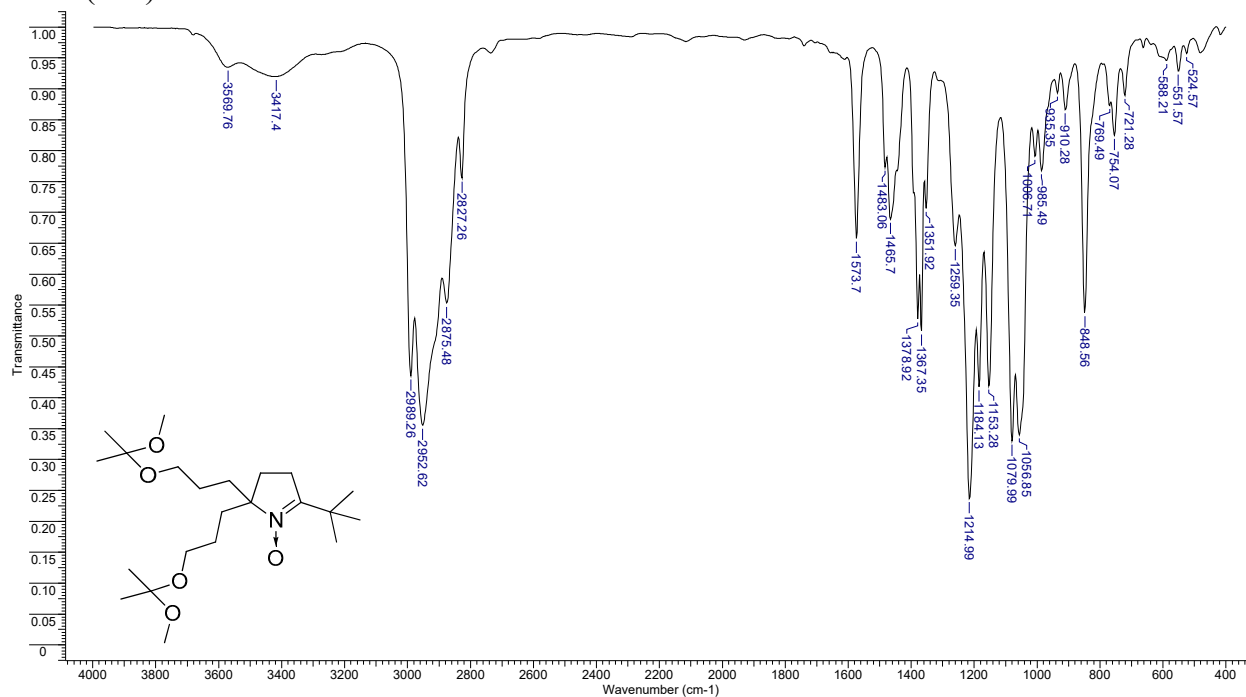

Figure S11. IR spectrum of 12b (neat)

1.12 2-*tert*-Butyl-2-ethyl-5,5-bis(3-hydroxypropyl)pyrrolidine-1-oxyl (14a)

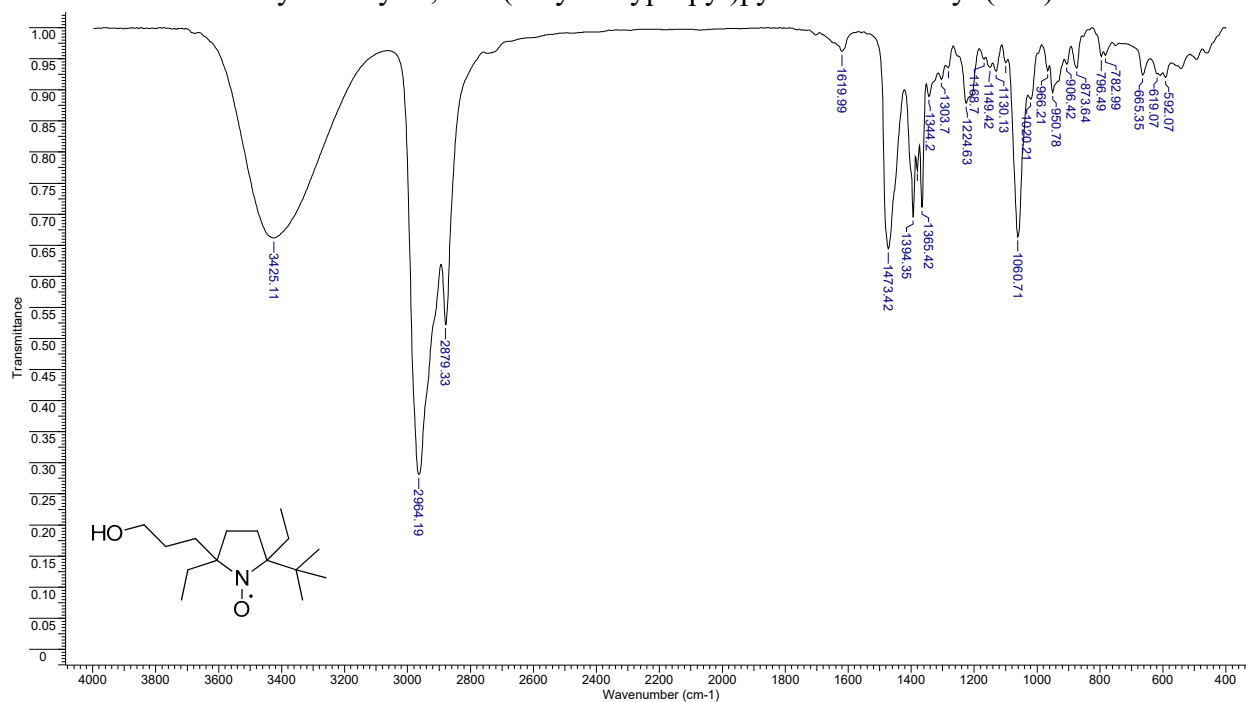

Figure S12. IR spectrum of 14a (neat)



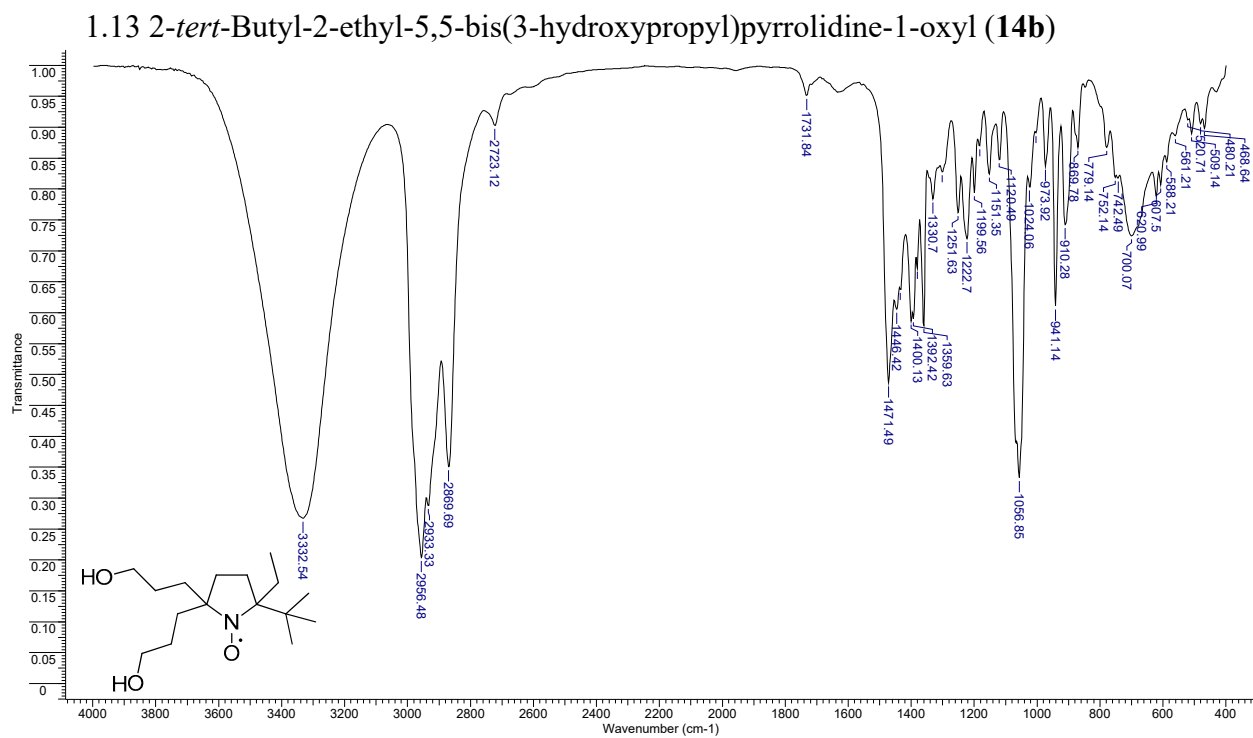

Figure S13. IR spectrum of **14b** (KBr)

## 2. $^1\text{H}$ and $^{13}\text{C}$ NMR spectral data

### 2.1 Methyl 3-(5-*tert*-butyl-2-ethyl-1-oxido-3,4-dihydro-2*H*-pyrrol-2-yl)propanoate (**4a**)

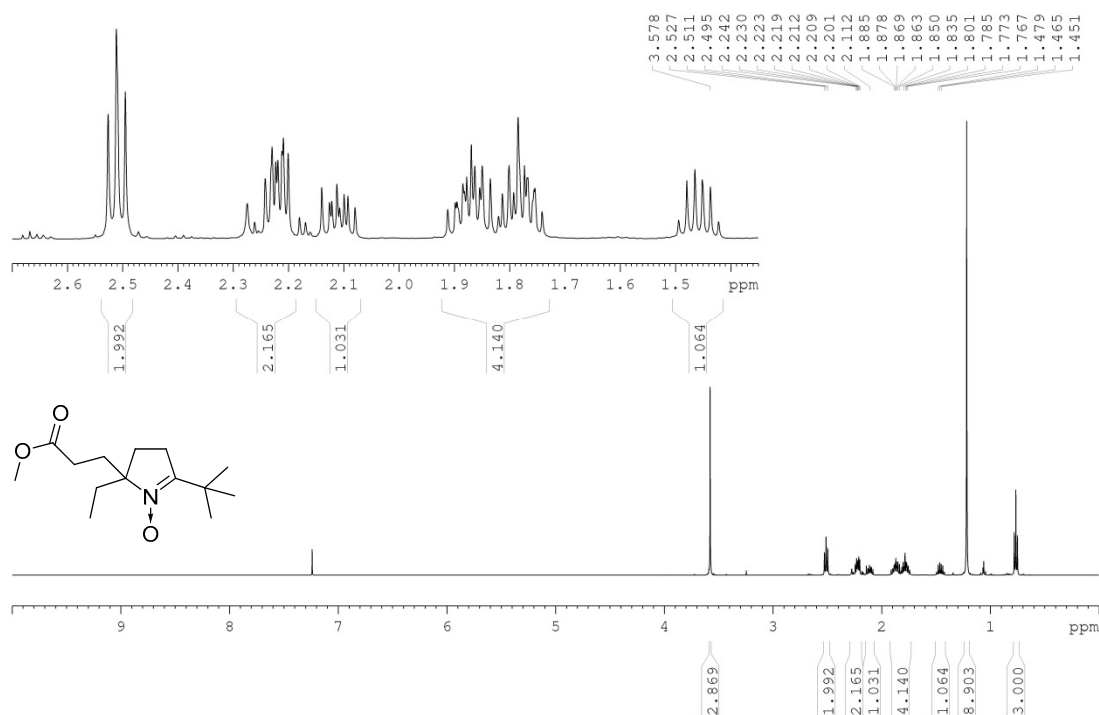

**Figure S14.**  $^1\text{H}$  NMR spectrum of **4a** in  $\text{CDCl}_3$  at 500 MHz

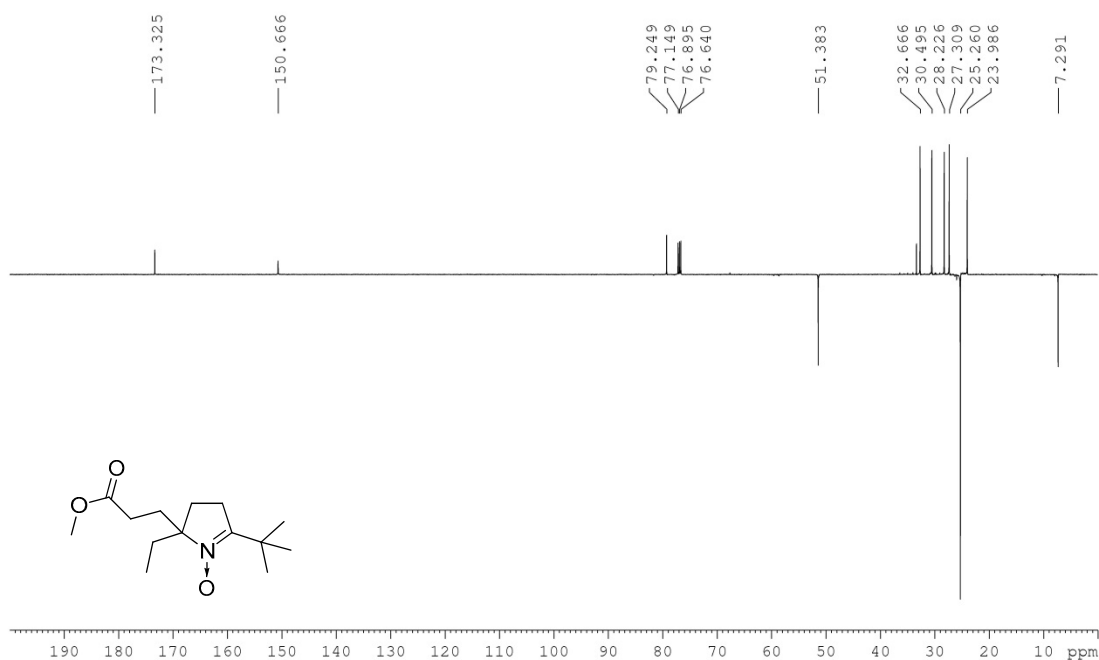

**Figure S15.**  $^{13}\text{C}$  NMR spectrum of **4a** in  $\text{CDCl}_3$  at 125 MHz

2.2 Dimethyl 3,3'-(5-*tert*-butyl-1-oxido-3,4-dihydro-2*H*-pyrrole-2,2-diyl)dipropionate (**4b**)

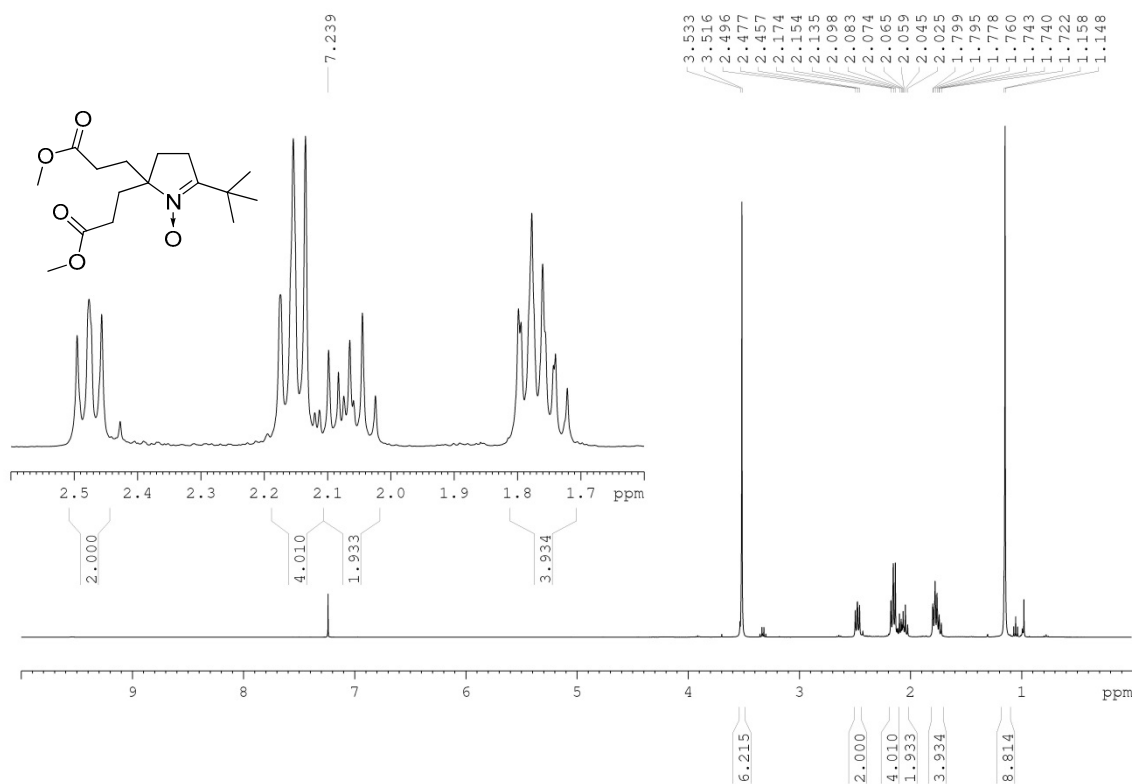

**Figure S16.** <sup>1</sup>H NMR spectrum of **4b** in CDCl<sub>3</sub> at 400 MHz

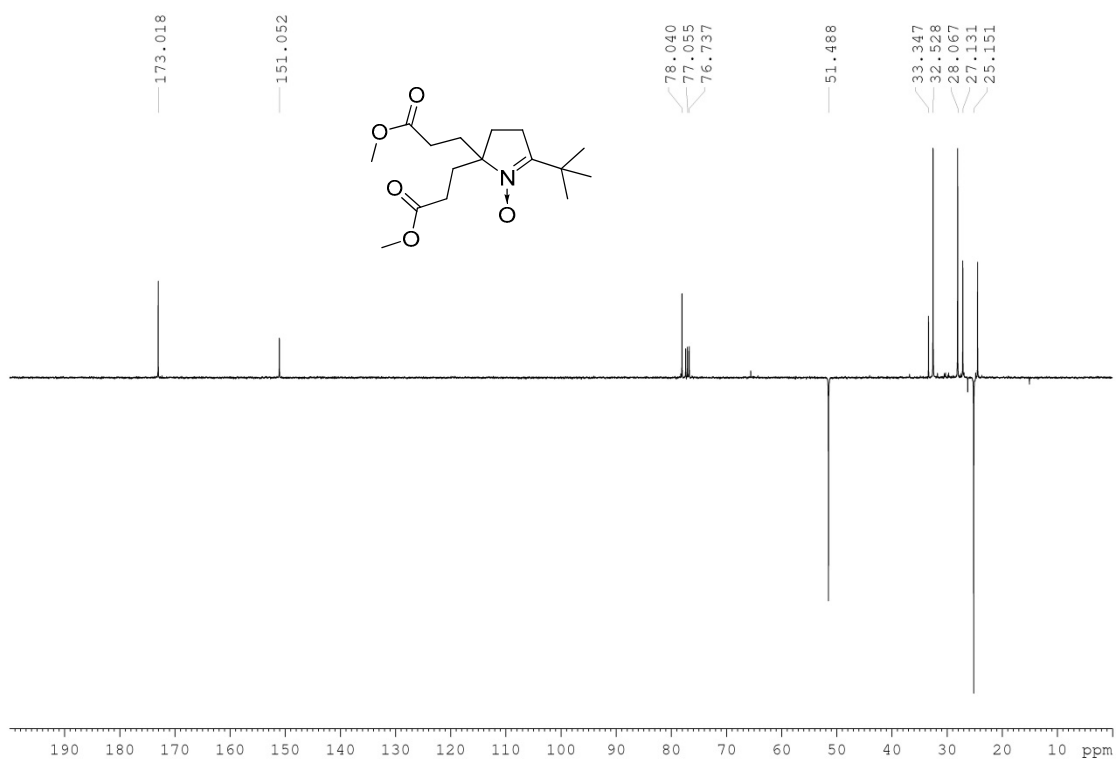

**Figure S17.** <sup>13</sup>C NMR spectrum of **4b** in CDCl<sub>3</sub> at 100 MHz

2.3 3-(5-*tert*-Butyl-2-ethyl-1-oxido-3,4-dihydro-2*H*-pyrrol-2-yl)propanoic acid (**5a**)

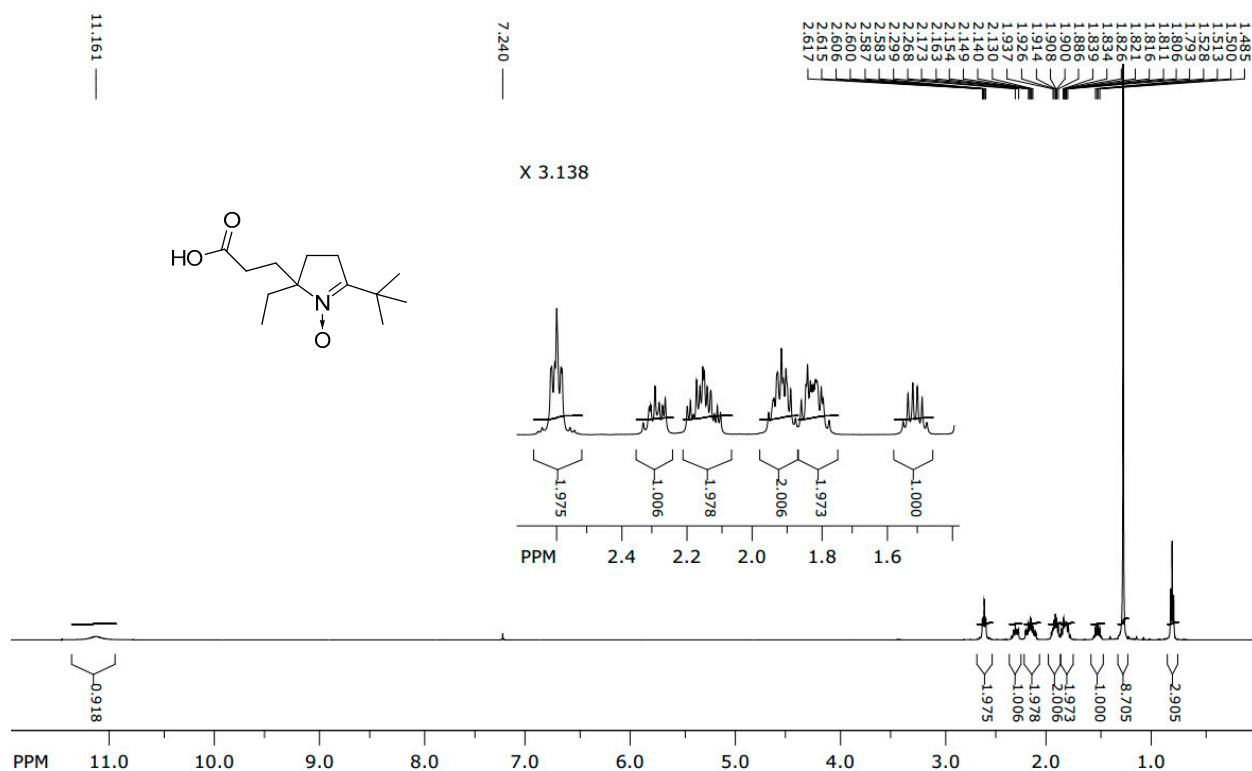

**Figure S18.** <sup>1</sup>H NMR spectrum of **5a** in CDCl<sub>3</sub> at 500 MHz

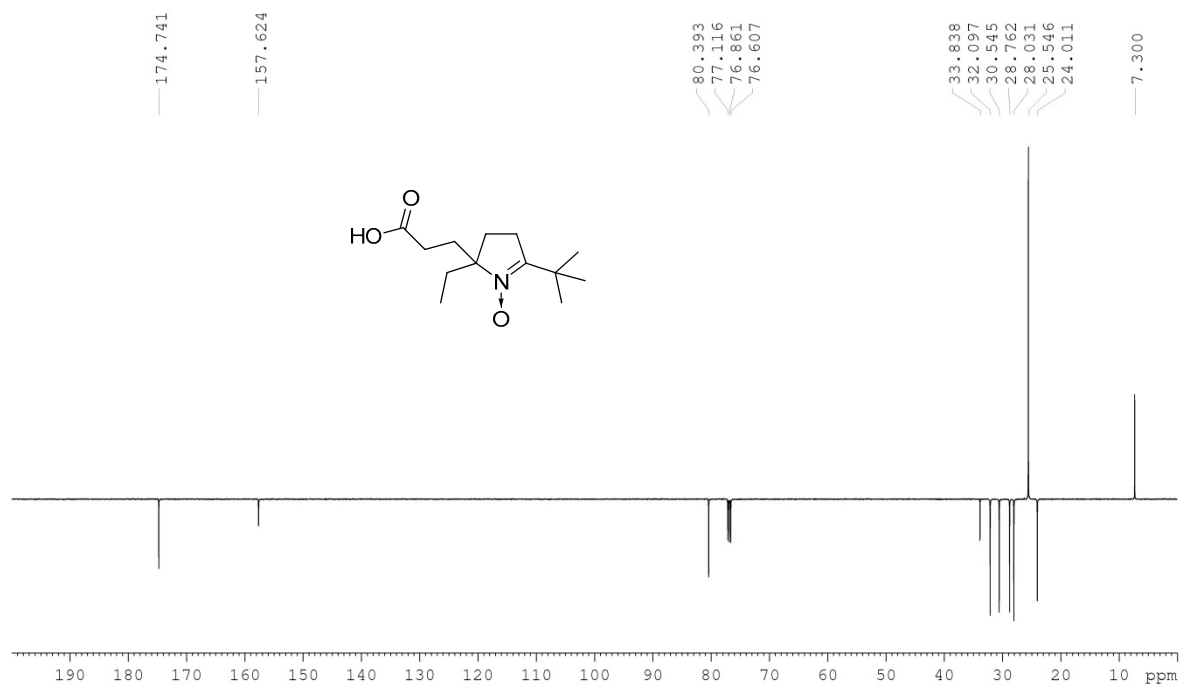

**Figure S19.** <sup>13</sup>C NMR spectrum of **5a** in CDCl<sub>3</sub> at 125 MHz

2.4 3,3'-(5-*tert*-Butyl-1-oxido-3,4-dihydro-2*H*-pyrrole-2,2-diyl)dipropionic acid (**5b**)

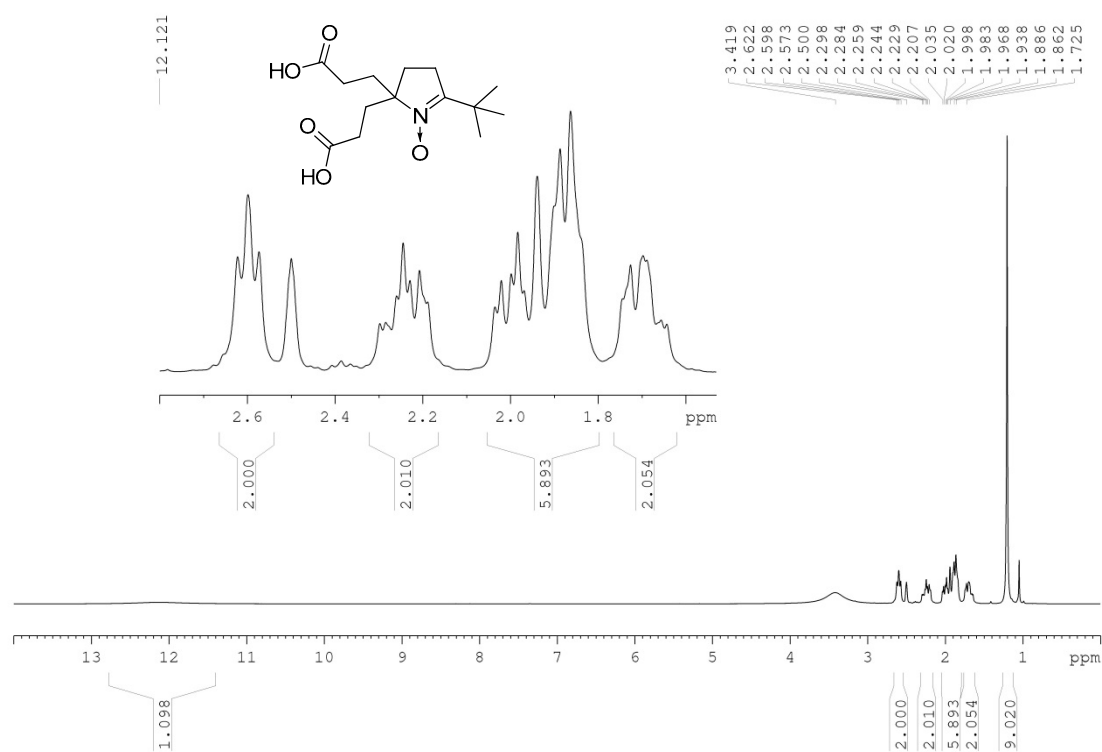

**Figure S20.** <sup>1</sup>H NMR spectrum of **5b** in DMSO-d<sub>6</sub> at 300 MHz

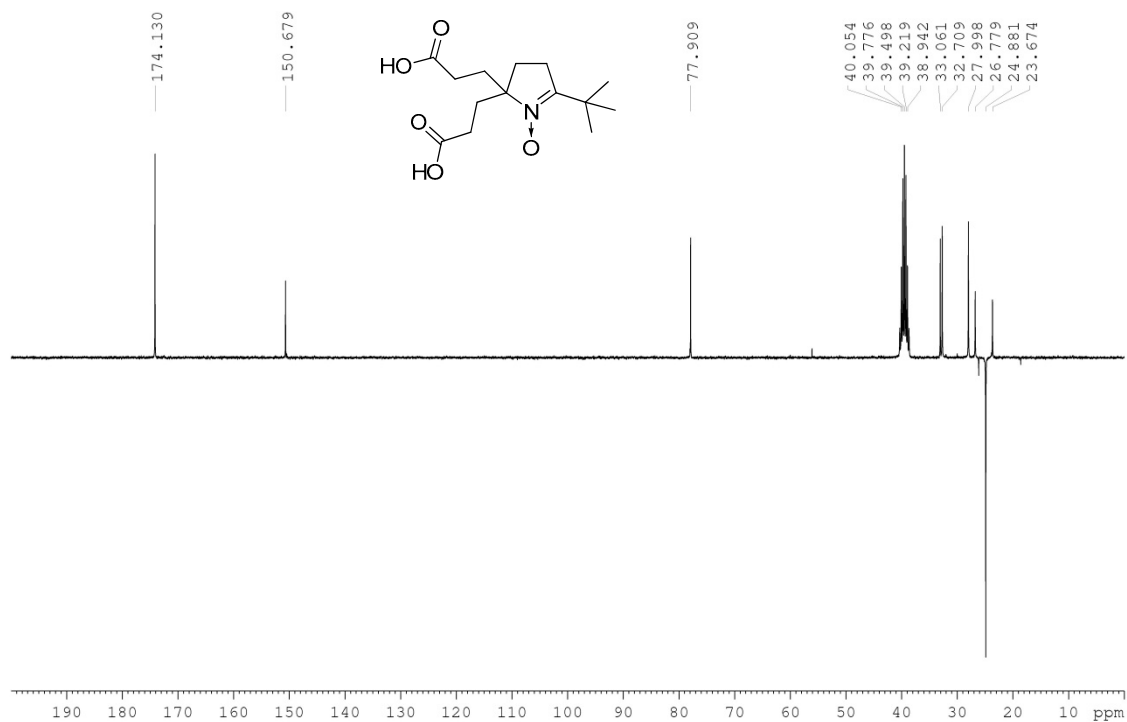

**Figure S21.** <sup>13</sup>C NMR spectrum of **5b** in DMSO-d<sub>6</sub> at 75 MHz

2.5 2-*tert*-Butyl-5-(2-carboxyethyl)-5-ethyl-2-ethynylpyrrolidinium trifluoroacetate (mixture of diastereomers) (**7a,a'**<sub>red</sub>)

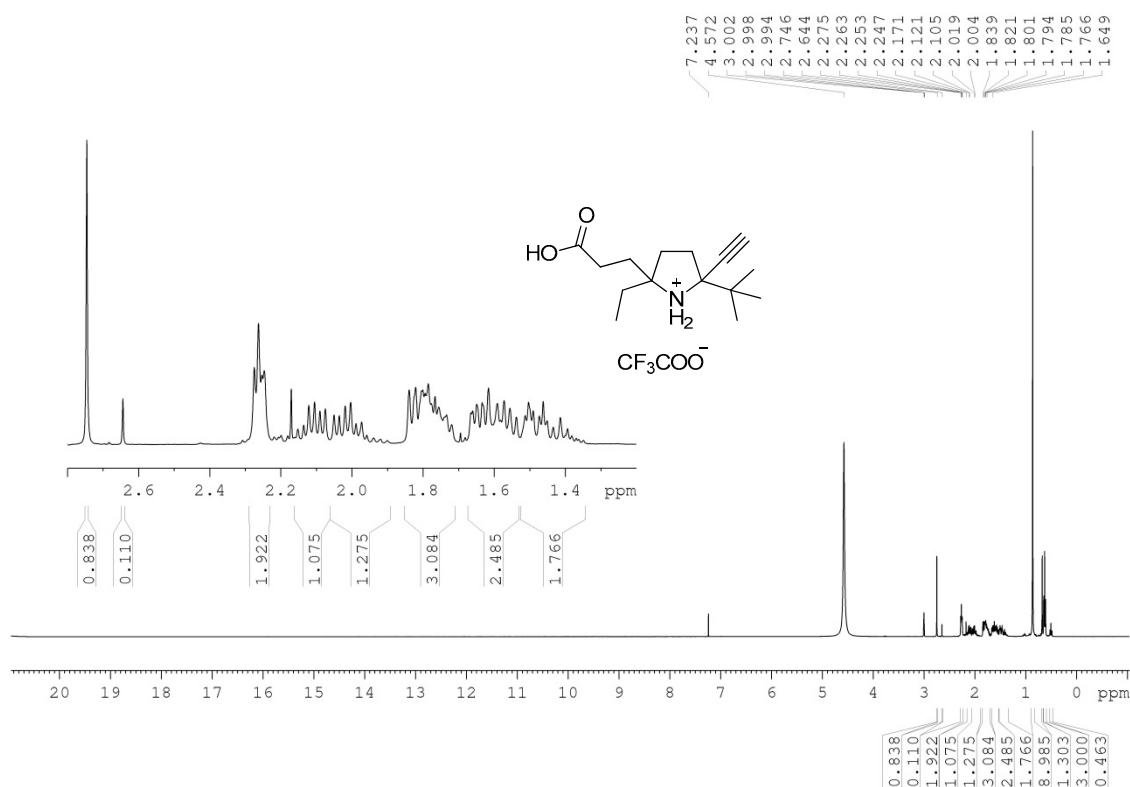

**Figure S22.**  $^1\text{H}$  NMR spectrum of **7a,a'**<sub>red</sub> in  $\text{CDCl}_3$ - $\text{CD}_3\text{OD}$  at 400 MHz

2.6 2-*tert*-Butyl-5-ethyl-2-ethynyl-5-(3-methoxy-3-oxopropyl)pyrrolidinium trifluoroacetate (**8a\_red**)

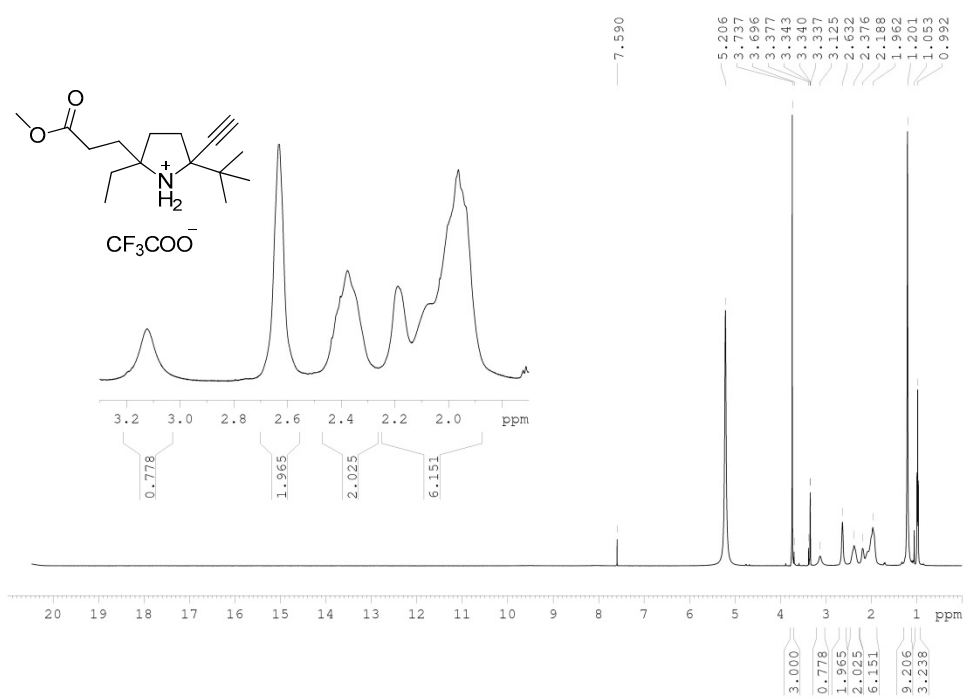

**Figure S23.**  $^1\text{H}$  NMR spectrum of **8a\_red** in  $\text{CDCl}_3$ - $\text{CD}_3\text{OD}$  at 500 MHz at 298 K

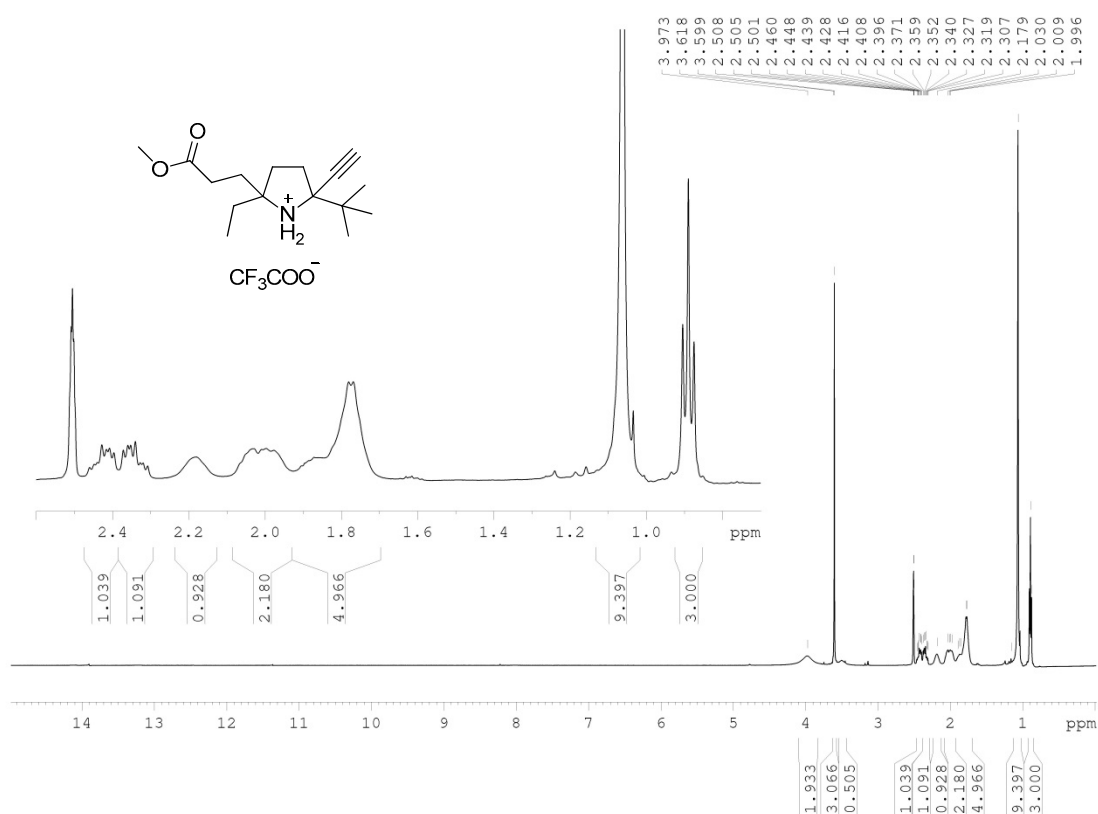

**Figure S24.** <sup>1</sup>H NMR spectrum of **8a<sub>red</sub>** in DMSO-*d*<sub>6</sub> at 500 MHz at 333 K

2.7 2-*tert*-Butyl-5-(2-carboxyethyl)-2,5-diethylpyrrolidinium trifluoroacetate (**10a<sub>red</sub>**)

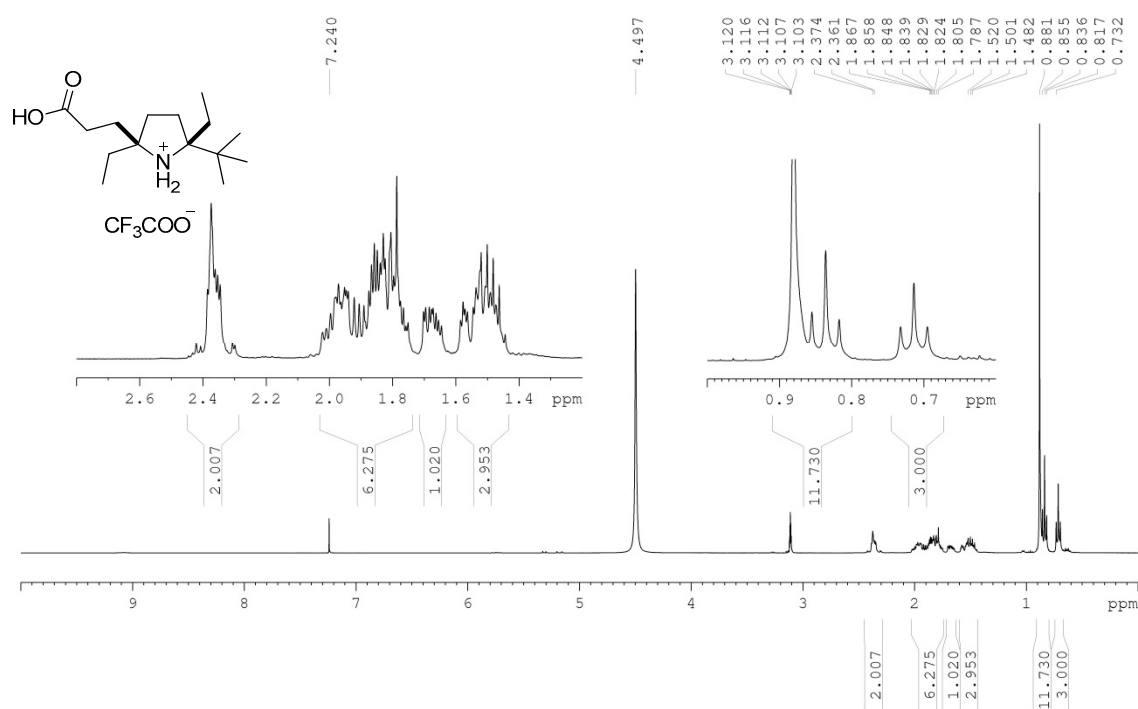

**Figure S25.** <sup>1</sup>H NMR spectrum of **10a<sub>red</sub>** in CDCl<sub>3</sub>-CD<sub>3</sub>OD at 400 MHz

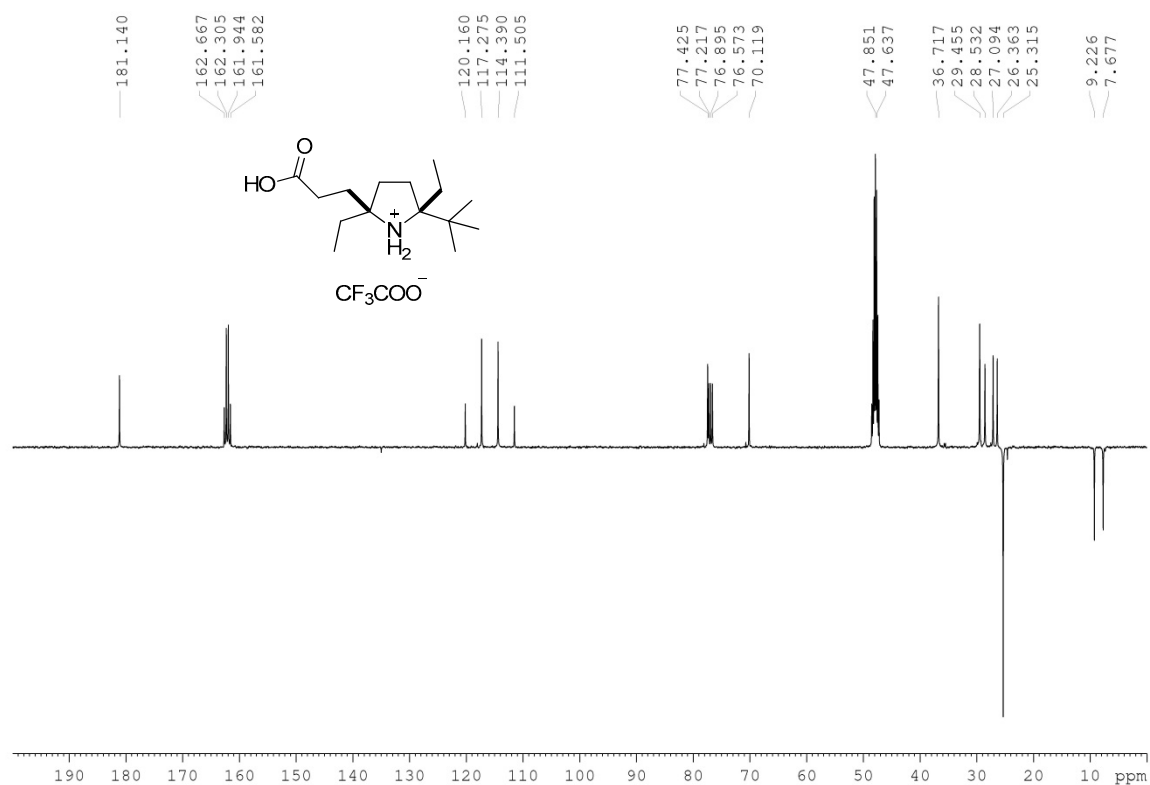

**Figure S26.** <sup>13</sup>C NMR spectrum of **10a<sub>red</sub>** in CDCl<sub>3</sub>-CD<sub>3</sub>OD at 100 MHz

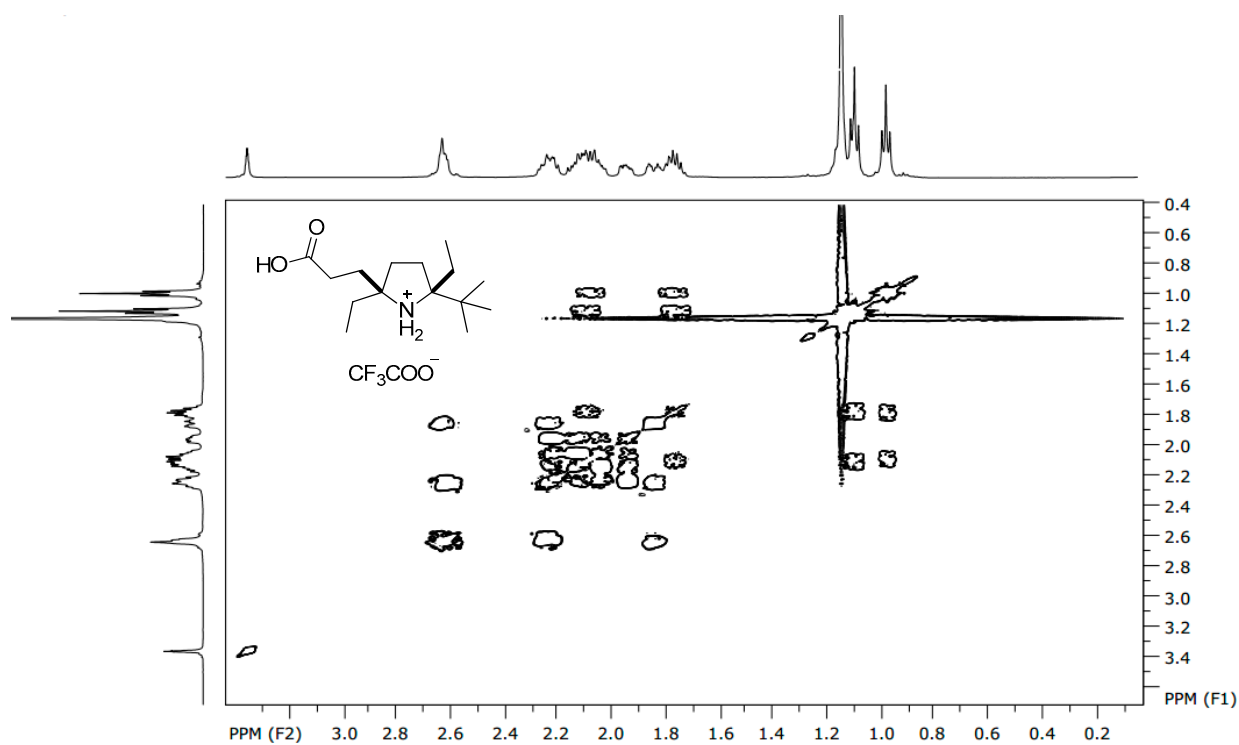

**Figure S27.** <sup>1</sup>H-<sup>1</sup>H COSY NMR spectrum of **10a<sub>red</sub>** in CDCl<sub>3</sub>-CD<sub>3</sub>OD



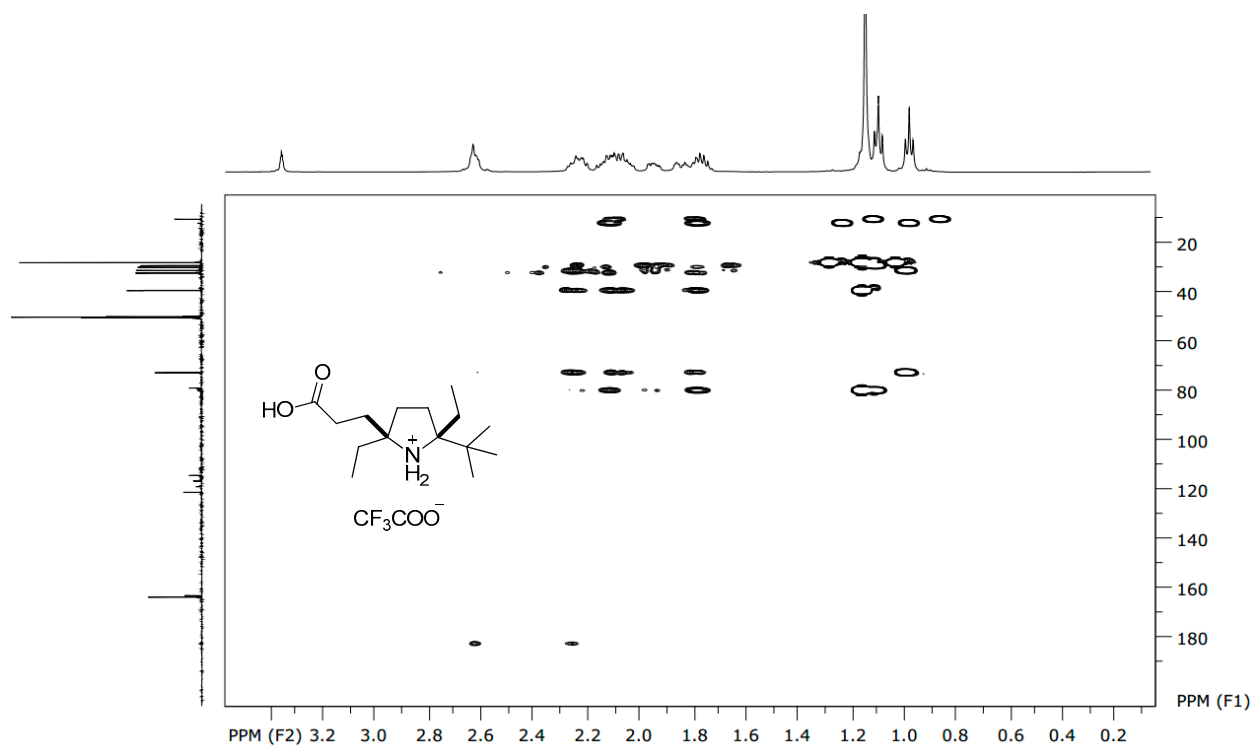

**Figure S28.**  $^1\text{H}$ - $^{13}\text{C}$  HMBC NMR spectrum of **10a<sub>red</sub>** in  $\text{CDCl}_3$ - $\text{CD}_3\text{OD}$

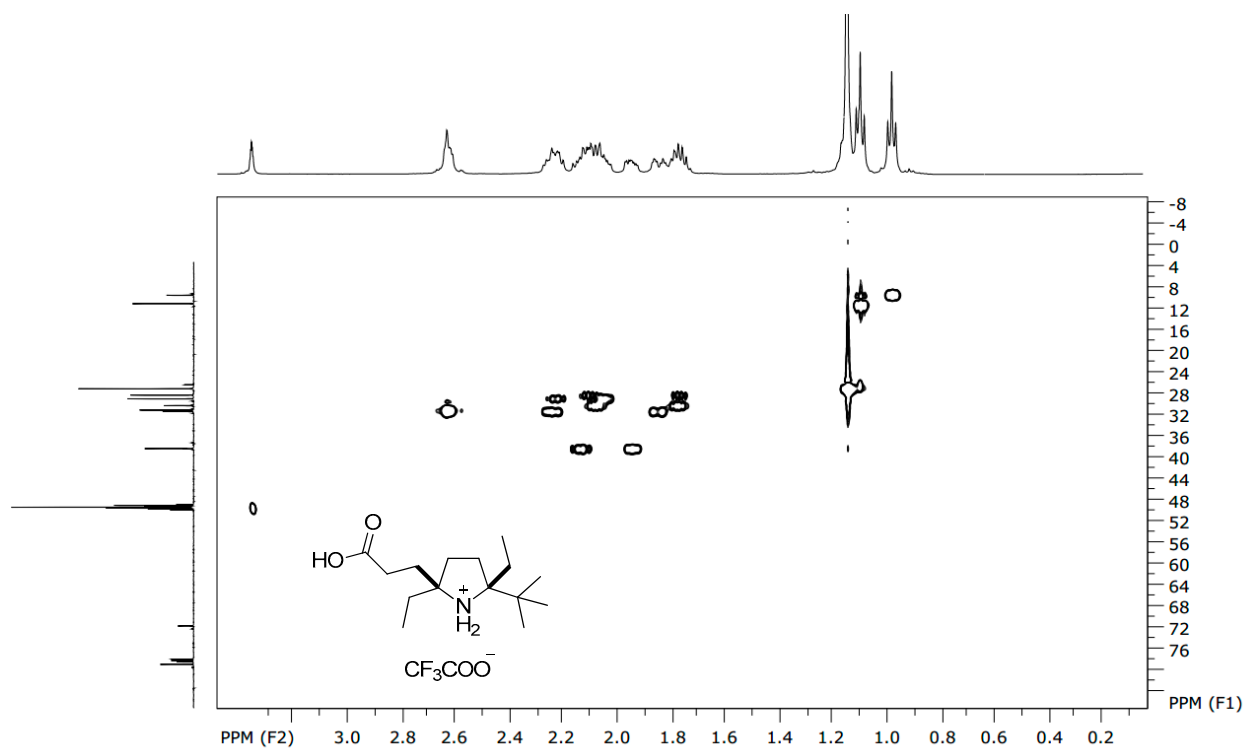

**Figure S29.**  $^1\text{H}$ - $^{13}\text{C}$  HSQC NMR spectrum of **10a<sub>red</sub>** in  $\text{CDCl}_3$ - $\text{CD}_3\text{OD}$

2.8 3-(5-*tert*-Butyl-2-ethyl-1-oxido-3,4-dihydro-2*H*-pyrrol-2-yl)-1-propanol (**11a**)

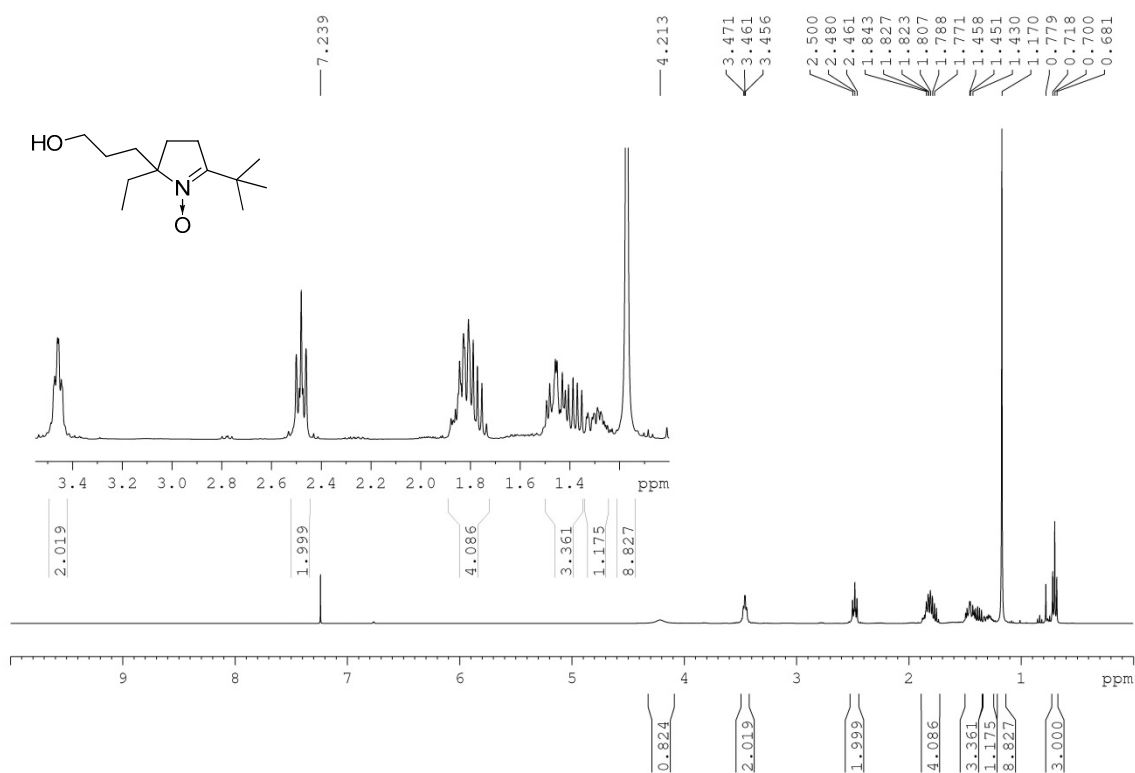

**Figure S30.** <sup>1</sup>H NMR spectrum of **11a** in CDCl<sub>3</sub> at 400 MHz

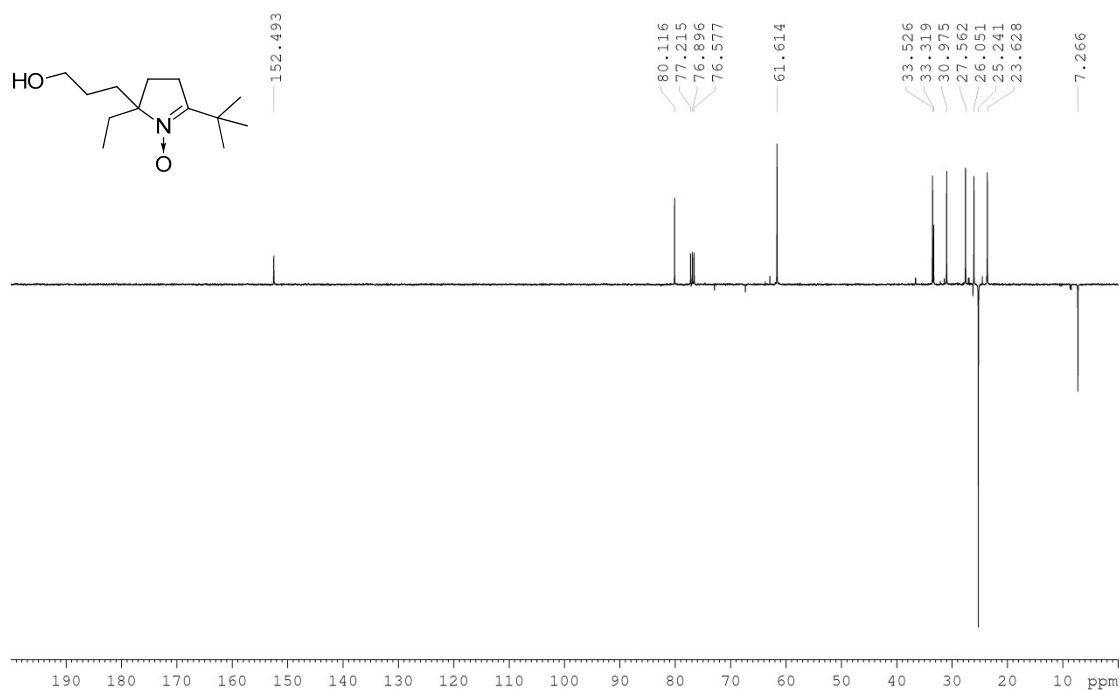

**Figure S31.** <sup>13</sup>C NMR spectrum of **11a** in CDCl<sub>3</sub> at 100 MHz

2.9 3,3'-(5-*tert*-Butyl-1-oxido-3,4-dihydro-2*H*-pyrrole-2,2-diyl)di(1-propanol) (**11b**)

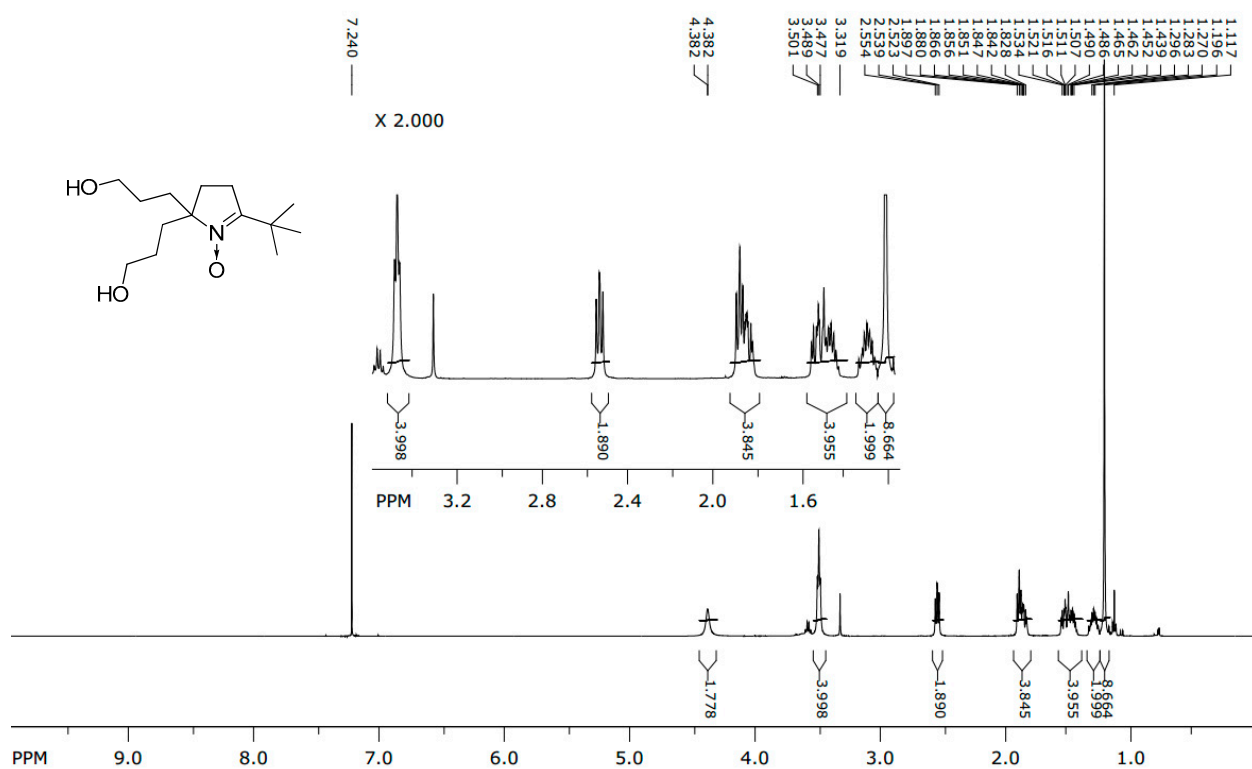

Figure S32. <sup>1</sup>H NMR spectrum of **11b** in CDCl<sub>3</sub> at 500 MHz

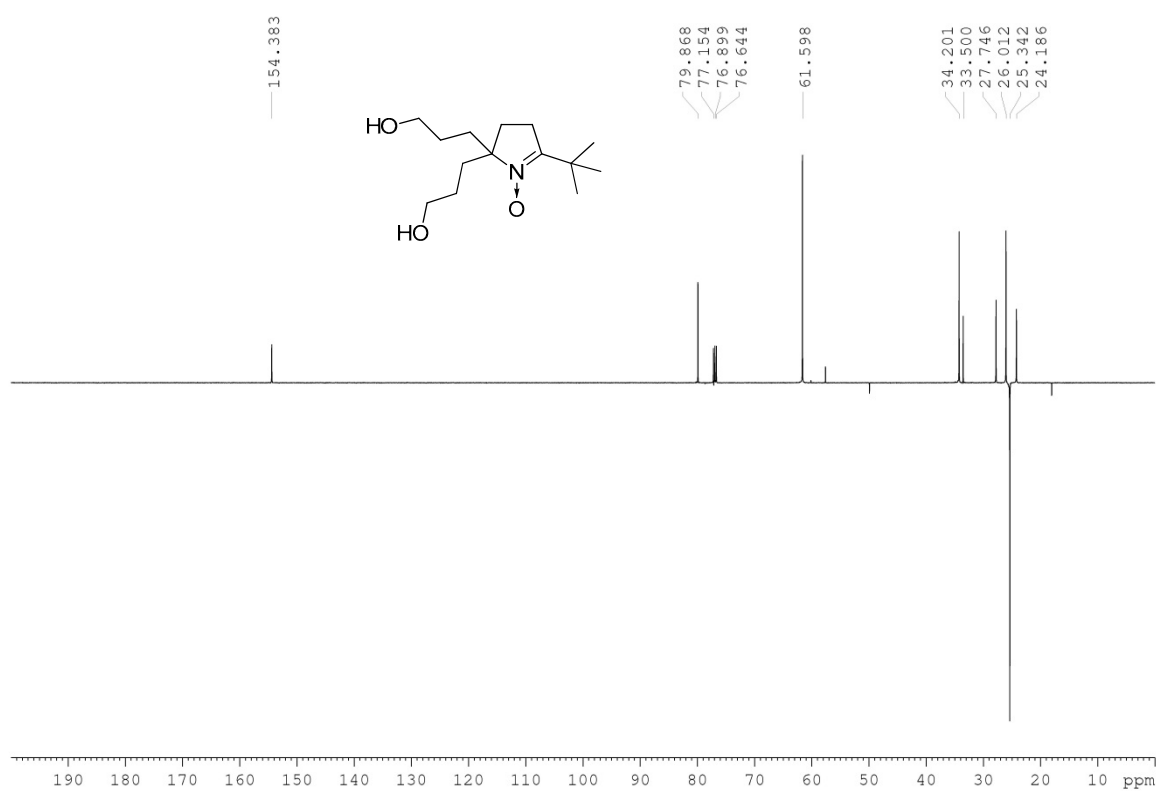

Figure S33. <sup>13</sup>C NMR spectrum of **11b** in CDCl<sub>3</sub> at 125 MHz

2.10 5-*tert*-Butyl-2-ethyl-2-[3-(1-methoxy-1-methylethoxy)propyl]-3,4-dihydro-2*H*-pyrrole 1-oxide (**12a**)

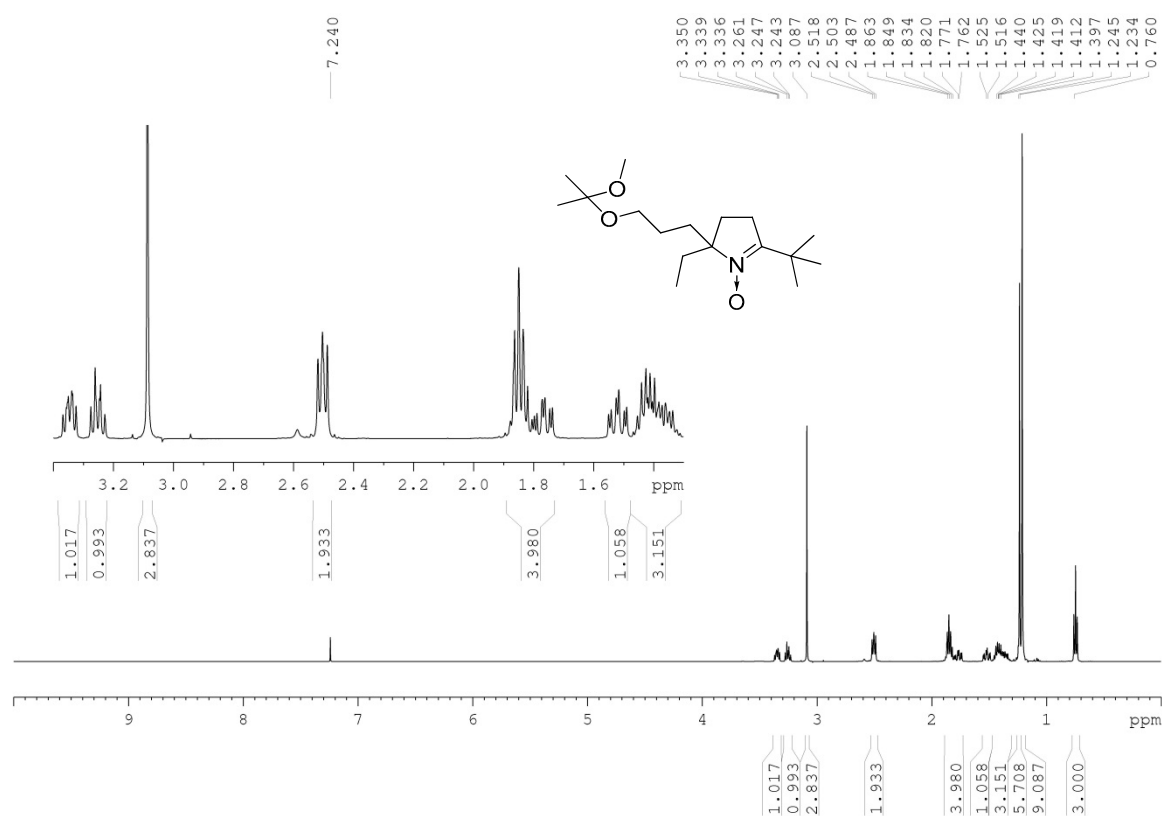

Figure S34. <sup>1</sup>H NMR spectrum of **12a** in CDCl<sub>3</sub> at 500 MHz

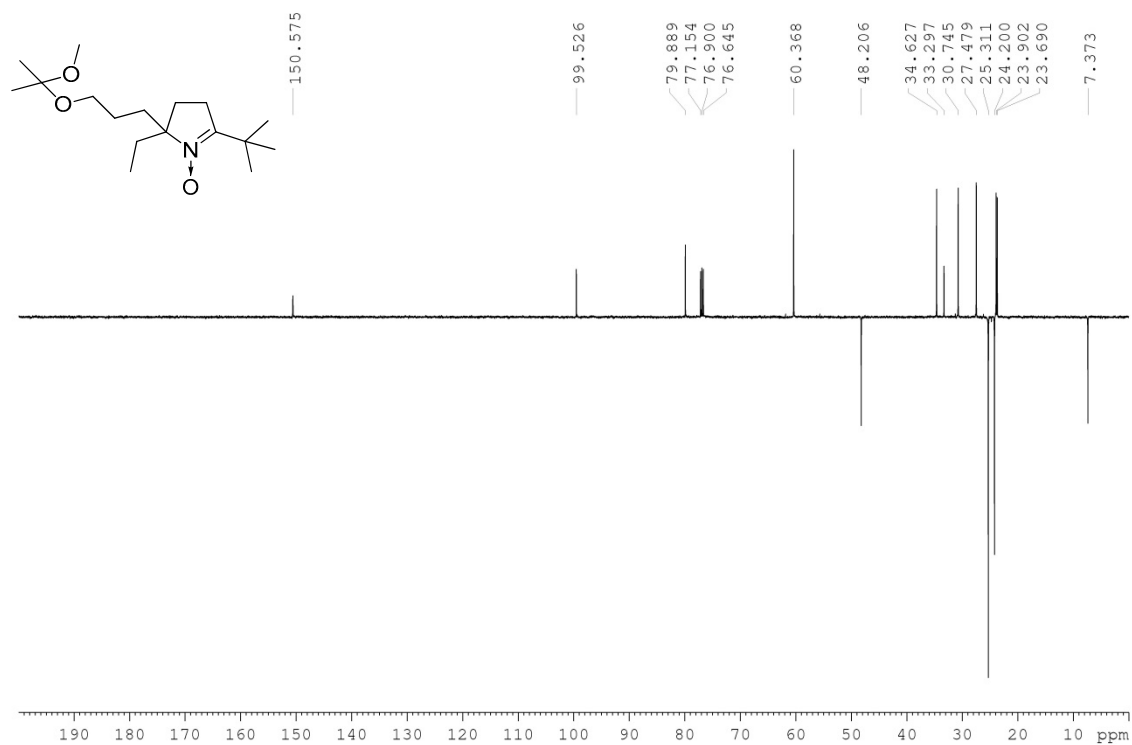

Figure S35. <sup>13</sup>C NMR spectrum of **12a** in CDCl<sub>3</sub> at 125 MHz

2.11 5-*tert*-Butyl-2,2-bis[3-(1-methoxy-1-methylethoxy)propyl]-3,4-dihydro-2*H*-pyrrole 1-oxide (**12b**)

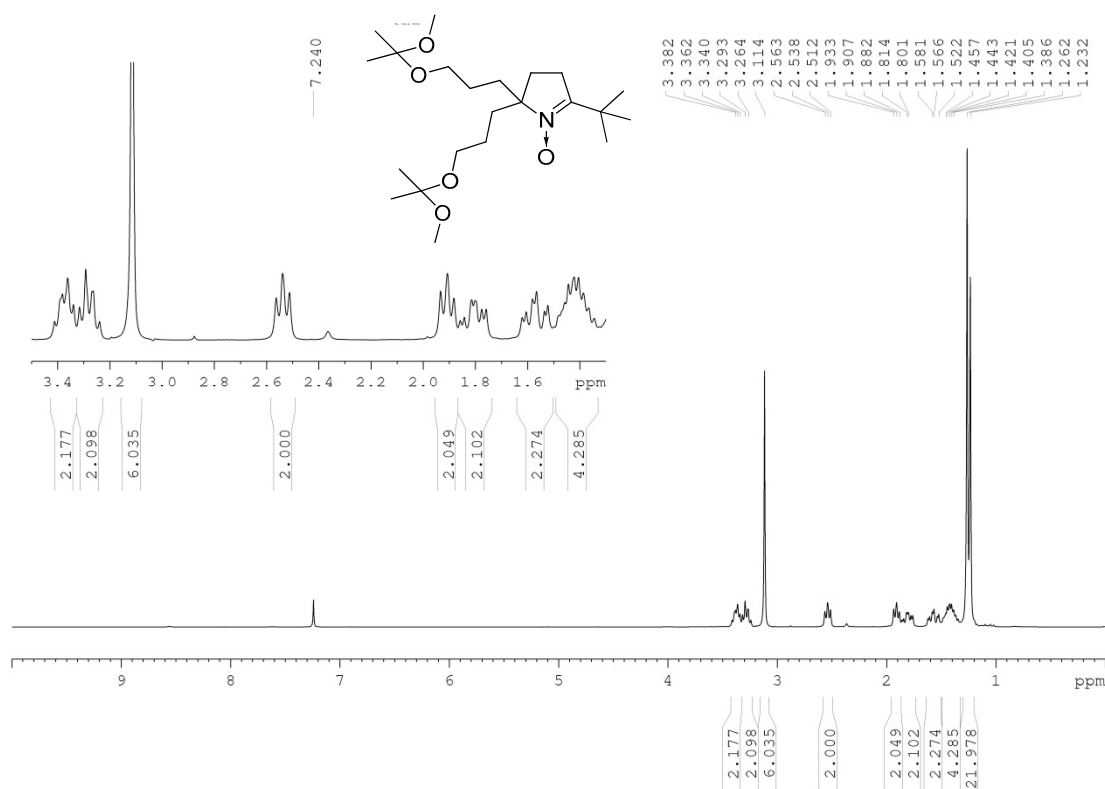

Figure S36. <sup>1</sup>H NMR spectrum of **12b** in CDCl<sub>3</sub> at 300 MHz

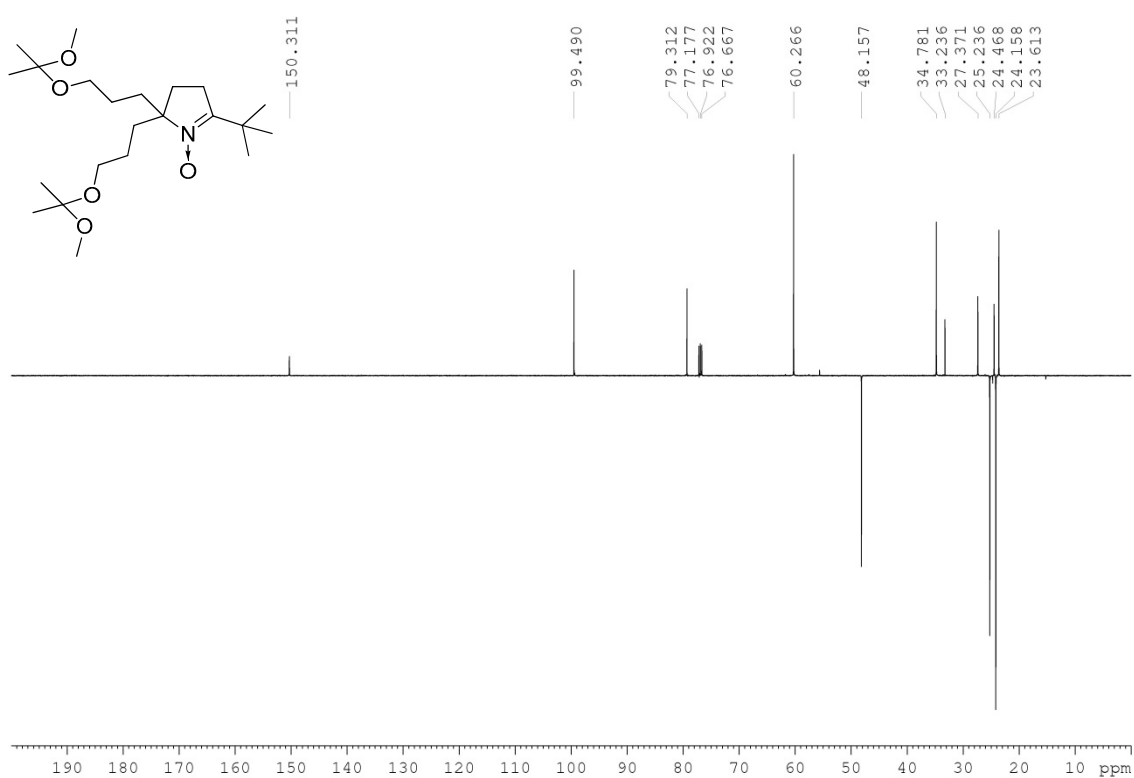

Figure S37. <sup>13</sup>C NMR spectrum of **12b** in CDCl<sub>3</sub> at 125 MHz

2.12 2-*tert*-Butyl-2,5-diethyl-5-(3-hydroxypropyl)pyrrolidinium trifluoroacetate (mixture of diastereomers) (**14a<sub>red</sub>**)

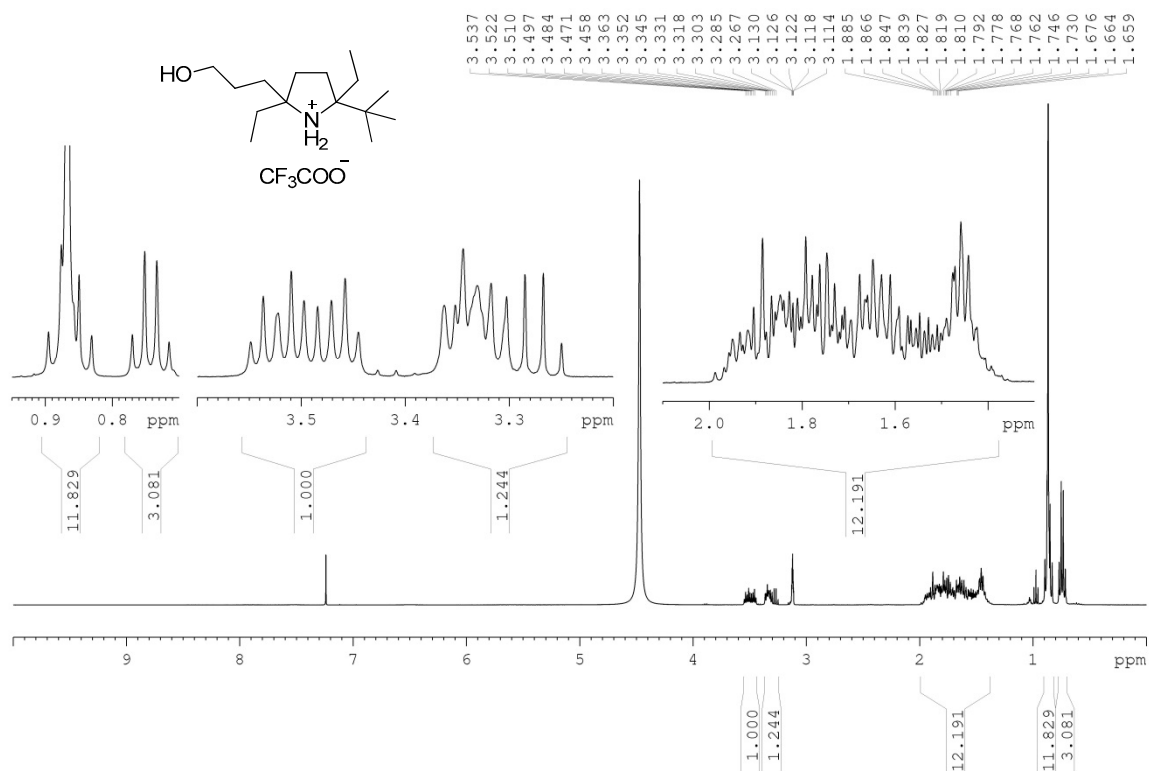

**Figure S38.** <sup>1</sup>H NMR spectrum of **14a<sub>red</sub>** in CDCl<sub>3</sub>-CD<sub>3</sub>OD at 400 MHz

2.13 2-*tert*-Butyl-2-ethyl-5,5-bis(3-hydroxypropyl)pyrrolidinium trifluoroacetate (**14b<sub>red</sub>**)

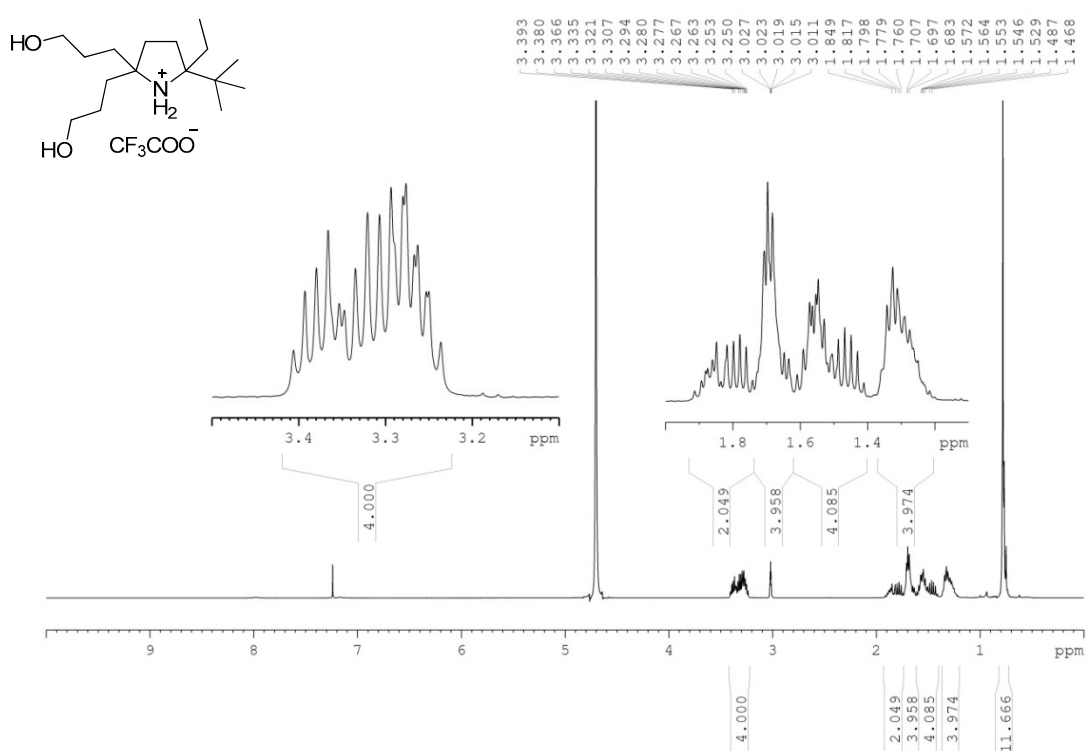

**Figure S39.** <sup>1</sup>H NMR spectrum of **14b<sub>red</sub>** in CDCl<sub>3</sub>-CD<sub>3</sub>OD at 400 MHz

### 3. HPLC analysis

#### 3.1 HPLC analysis of 2-*tert*-Butyl-2-ethyl-5,5-bis(3-hydroxypropyl)pyrrolidine-1-oxyl (**14a**)

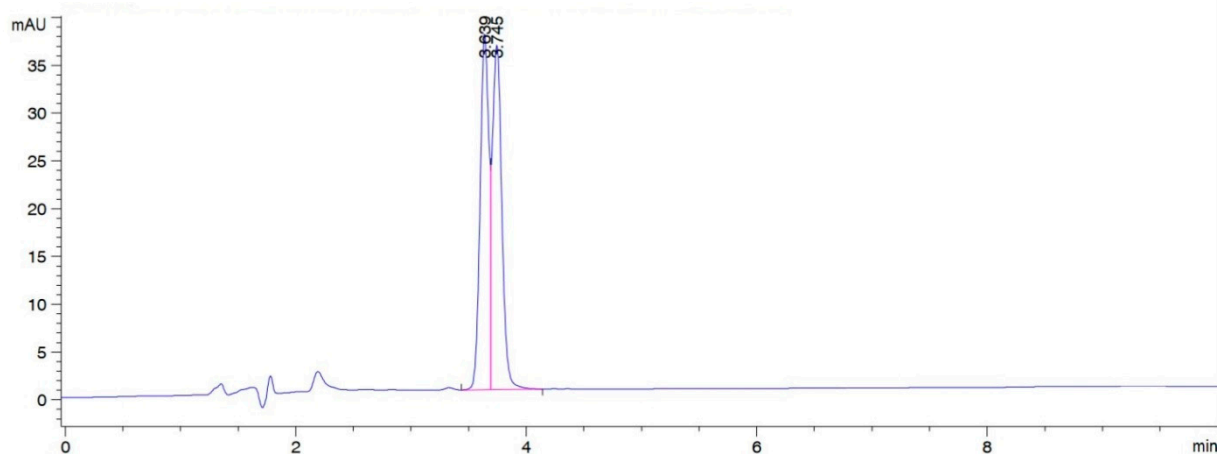

**Figure S40.** The HPLC analysis of **14a**
